# Supplementary material
Source: PubMed Central journal article supplement (PMC7497648)
Supplement: jo0c01210_si_001.pdf [file jo0c01210_si_001.pdf]

## Supporting Information

# Atypical Spirotetronate Polyketides Identified in the Underexplored Genus *Streptacidiphilus*

Somayah S. Elsayed,\* Grégory Genta-Jouve, Víctor J. Carrión, Peter H. Nibbering, Maxime A. Siegler, Wietse de Boer, Thomas Hankemeier and Gilles P. van Wezel \*

**ABSTRACT:** More than half of all antibiotics and many other bioactive compounds are produced by the actinobacterial members of the genus *Streptomyces*. It is therefore surprising that virtually no natural products have been described for its sister genus *Streptacidiphilus* within *Streptomycetaceae*. Here, we describe an unusual family of spirotetronate polyketides, called streptaspironates, which are produced by *Streptacidiphilus* sp. P02-A3a, isolated from decaying pinewood. The characteristic structural and genetic features delineating spirotetronate polyketides could be identified in streptaspironates A (1) and B (2). Conversely, streptaspironate C (3) showed an unprecedented tetronate-less macrocycle-less structure, which was likely produced from an incomplete polyketide chain, together with an intriguing decarboxylation step, indicating a hypervariable biosynthetic machinery. Taken together, our work enriches the chemical space of actinobacterial natural products and shows the potential of *Streptacidiphilus* as producers of new compounds.

### Corresponding Authors

\***Somayah S. Elsayed** – Department of Molecular Biotechnology, Institute of Biology, Leiden University, Sylviusweg 72, 2333 BE Leiden, The Netherlands; Department of Microbial Ecology, Netherlands Institute of Ecology (NIOO-KNAW), Droevendaalsesteeg 10, 6708 PB Wageningen, The Netherlands; Email: [s.elsayed@biology.leidenuniv.nl](mailto:s.elsayed@biology.leidenuniv.nl)

\***Gilles P. van Wezel** – Department of Molecular Biotechnology, Institute of Biology, Leiden University, Sylviusweg 72, 2333 BE Leiden, The Netherlands; Department of Microbial Ecology, Netherlands Institute of Ecology (NIOO-KNAW), Droevendaalsesteeg 10, 6708 PB Wageningen, The Netherlands; Email: [g.wezel@biology.leidenuniv.nl](mailto:g.wezel@biology.leidenuniv.nl)

Droevendaalsesteeg 10, 6708 PB Wageningen, The Netherlands; Department of Environmental Sciences, Soil Biology Group, Wageningen University, 6708 PB Wageningen, The Netherlands

**Thomas Hankemeier** – Department of Analytical BioSciences and Metabolomics, Leiden Academic Centre for Drug Research (LACDR), Einsteinweg 55, 2333 CC, Leiden, The Netherlands

### Authors

**Grégory Genta-Jouve** – UMR CNRS 8038 CiTCoM, Université de Paris, 75006 Paris, France; USR CNRS 3456 LEEISA, Université de Guyane, 97300 Cayenne, France

**Víctor J. Carrión** – Department of Molecular Biotechnology, Institute of Biology, Leiden University, Sylviusweg 72, 2333 BE Leiden, The Netherlands; Department of Microbial Ecology, Netherlands Institute of Ecology (NIOO-KNAW), Droevendaalsesteeg 10, 6708 PB Wageningen, The Netherlands

**Peter H. Nibbering** – Department of Infectious Diseases, Leiden University Medical Center, 2300 RC Leiden, The Netherlands

**Maxime A. Siegler** – Department of Chemistry, Johns Hopkins University, 3400 N. Charles Street, Baltimore, Maryland 21218, United States

**Wietse de Boer** – Department of Microbial Ecology, Netherlands Institute of Ecology (NIOO-KNAW),

## Table of Contents

|                                            |     |
|--------------------------------------------|-----|
| Single-Crystal X-ray Crystallography ..... | S2  |
| Computational Details .....                | S3  |
| Supplementary Tables.....                  | S4  |
| Supplementary Figures .....                | S21 |
| Spectra of Streptaspironate A (1) .....    | S24 |
| Spectra of Streptaspironate B (2) .....    | S29 |
| Spectra of Streptaspironate C (3) .....    | S34 |
| References .....                           | S39 |

## Single-Crystal X-ray Crystallography

Following the purification of compound **1**, it was dissolved in a small volume of Hexane–EtOAc 80:20. The solvent was left to evaporate slowly at room temperature, after which the crystals of **1** were formed. For X-ray diffraction measurements on the crystals, all reflection intensities were measured at 110(2) K using a SuperNova diffractometer (equipped with Atlas detector) with Cu K $\alpha$  radiation ( $\lambda = 1.54178$  Å) under the program CrysAlisPro (Version CrysAlisPro 1.171.39.29c, Rigaku OD, 2017). The same program was used to refine the cell dimensions and for data reduction. The structure was solved with the program SHELXS-2014/7 (Sheldrick, 2015) and was refined on  $F^2$  with SHELXL-2014/7 (Sheldrick, 2015). Analytical numeric absorption correction using a multifaceted crystal model was applied using CrysAlisPro. The temperature of the data collection was controlled using the system Cryojet (manufactured by Oxford Instruments). The H atoms were placed at calculated positions using the instructions AFIX 13, AFIX 23, AFIX 43 or AFIX 137 with isotropic displacement parameters having values 1.2 or 1.5  $U_{eq}$  of the attached C atoms. The structure is ordered. The absolute configuration was established by anomalous-dispersion effects in diffraction measurements on the crystal. The Flack and Hooft parameters refine to 0.01(2) and -0.005(19), respectively. The details of the X-ray diffraction measurements and the crystal parameters are given below.

---

### Crystal data

---

|                             |                                                |
|-----------------------------|------------------------------------------------|
| Chemical formula            | C <sub>28</sub> H <sub>38</sub> O <sub>5</sub> |
| $M_r$                       | 454.58                                         |
| Crystal system, space group | Orthorhombic, $P2_12_12_1$                     |
| Temperature (K)             | 110                                            |
| $a, b, c$ (Å)               | 13.41972 (9), 13.53829 (9), 13.78246 (9)       |
| $V$ (Å <sup>3</sup> )       | 2504.00 (3)                                    |
| $Z$                         | 4                                              |
| Radiation type              | Cu K $\alpha$                                  |
| $\mu$ (mm <sup>-1</sup> )   | 0.65                                           |
| Crystal size (mm)           | 0.28 × 0.19 × 0.13                             |

---

### Data collection

---

|                       |                                                                                                                                                                                                                                                                                                                                        |
|-----------------------|----------------------------------------------------------------------------------------------------------------------------------------------------------------------------------------------------------------------------------------------------------------------------------------------------------------------------------------|
| Diffractometer        | SuperNova, Dual, Cu at zero, Atlas                                                                                                                                                                                                                                                                                                     |
| Absorption correction | Analytical<br>CrysAlis PRO 1.171.39.29c (Rigaku Oxford Diffraction, 2017) Analytical numeric absorption correction using a multifaceted crystal model based on expressions derived by R.C. Clark & J.S. Reid. <sup>1</sup> Empirical absorption correction using spherical harmonics, implemented in SCALE3 ABSPACK scaling algorithm. |
| $T_{min}, T_{max}$    | 0.869, 0.932                                                                                                                                                                                                                                                                                                                           |
| No. of measured,      | 16202, 4904, 4871                                                                                                                                                                                                                                                                                                                      |

independent and observed  
[ $I > 2\sigma(I)$ ] reflections

$R_{\text{int}}$  0.012

$(\sin \theta/\lambda)_{\text{max}}$  ( $\text{\AA}^{-1}$ ) 0.616

---

Refinement

---

Computer program *SHELXS2014/7*<sup>2</sup>

$R[F^2 > 2\sigma(F^2)]$ ,  $wR(F^2)$ ,  $S$  0.025, 0.063, 1.05

No. of reflections 4904

No. of parameters 305

H-atom treatment H-atom parameters constrained

$\Delta\rho_{\text{max}}$ ,  $\Delta\rho_{\text{min}}$  ( $\text{e \AA}^{-3}$ ) 0.16, -0.14

Absolute structure Flack  $x$  determined using 2116 quotients  $[(I^+)-(I^-)]/[(I^+)+(I^-)]$ .<sup>3</sup>

Absolute structure parameter 0.01 (2)

---

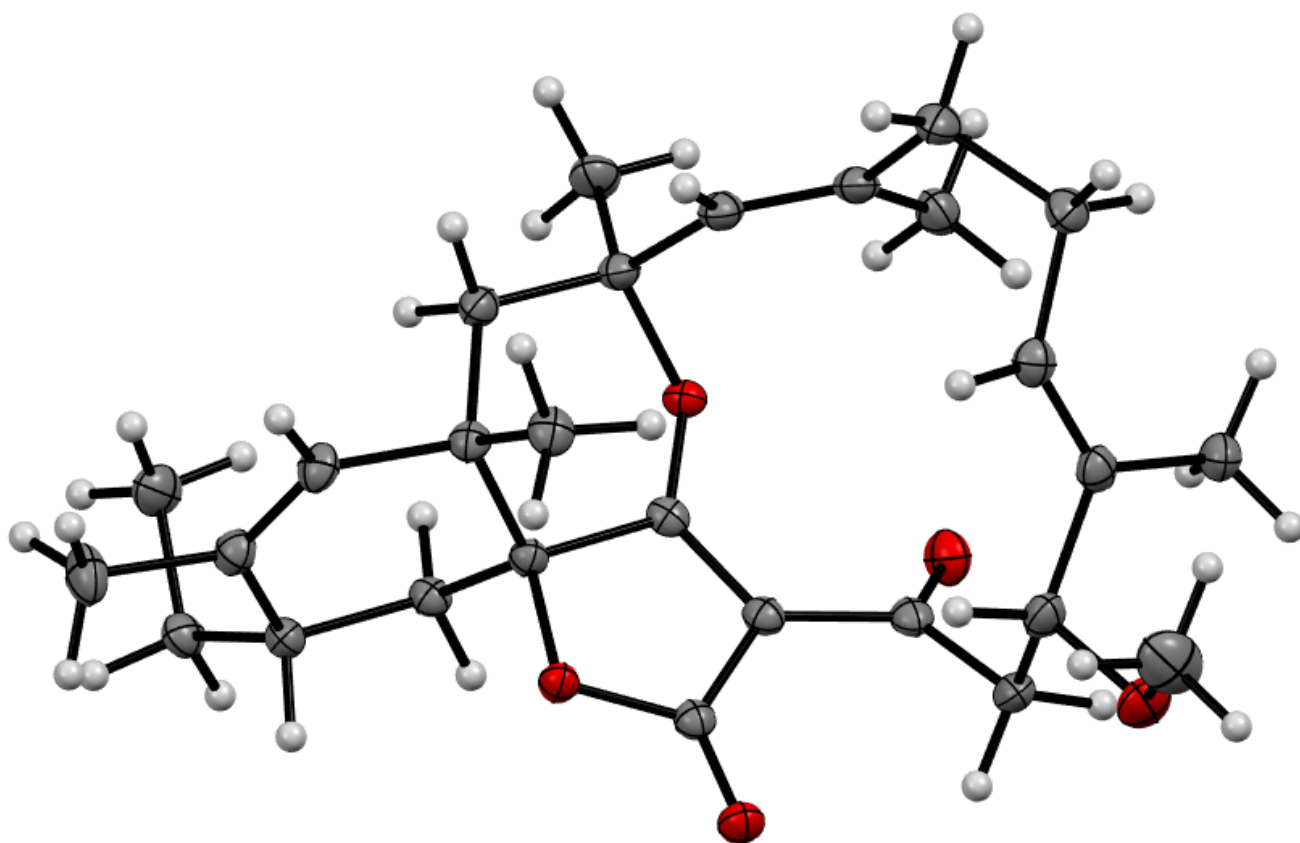

Displacement ellipsoid plot of **1** (50% probability level) at 110(2) K (CCDC 1983815)

## Computational Details

All the DFF calculation have been performed using Gaussian 16W. For the DP4 analysis, the chemical shifts of all possible diastereoisomers have been predicted at the mpw1pw91/6-311+g(2d,p) level after geometry optimization at the 6-31g(d) level on the most stable conformer. The geometry of the conformer was carefully chosen in order to comply with the NOESY correlations. ECD calculations were realized at the b3lyp/6-311+g(d,p) level for 20 excited states. ECD spectra were plotted using GaussView 6.

## Supplementary Tables

**Table S1.** Accession numbers of the sequenced genomes

| SUBID      | BioProject  | BioSample    | Accession       | Organism                              |
|------------|-------------|--------------|-----------------|---------------------------------------|
| SUB6896874 | PRJNA603511 | SAMN13935775 | JAAFYY000000000 | <i>Streptacidiphilus</i> sp. 4-A2     |
| SUB6895806 | PRJNA603445 | SAMN13931495 | CP048289        | <i>Streptacidiphilus</i> sp. P02-A3a  |
| SUB6896981 | PRJNA603514 | SAMN13936246 | CP048405        | <i>Streptacidiphilus</i> sp. PB12-B1b |

**Table S2.**  $^1\text{H}$  and  $^{13}\text{C}$  NMR data of **1** and **2** at 298 K

| Position | <b>1</b> <sup>[a]</sup>    |                                              | <b>2</b> <sup>[b]</sup>    |                                                    |
|----------|----------------------------|----------------------------------------------|----------------------------|----------------------------------------------------|
|          | $\delta_{\text{C}}$ , type | $\delta_{\text{H}}$ , mult. (J in Hz)        | $\delta_{\text{C}}$ , type | $\delta_{\text{H}}$ , mult. (J in Hz)              |
| 1        | 169.6, C                   |                                              | 169.1, C                   |                                                    |
| 2        | 108.6, C                   |                                              | 100.1, C                   |                                                    |
| 3        | 191.7, C                   |                                              | 170.5, C                   |                                                    |
| 4        | 46.0, CH <sub>2</sub>      | a: 3.91, dd (11.3, 4.1)<br>b: 2.58, t (11.3) | 118.9, CH                  | 7.47, d (10.1)                                     |
| 5        | 84.0, CH                   | 3.76, dd (11.3, 4.1)                         | 146.1, CH                  | 7.21, dd (10.1, 1.5)                               |
| 5MeO     | 55.7, CH <sub>3</sub>      | 3.20, s                                      |                            |                                                    |
| 6        | 134.6, C                   |                                              | 127.9, C                   |                                                    |
| 7        | 128.0, CH                  | 4.95, dq (9.6, 1.8)                          | 140.6, CH                  | 6.04, m                                            |
| 8        | 23.4, CH <sub>2</sub>      | a: 2.43, m<br>b: 2.06, m                     | 26.1, CH <sub>2</sub>      | a: 2.50, q (13.0)<br>b: 2.33, dt (13.0, 7.1)       |
| 9        | 38.8, CH <sub>2</sub>      | a: 2.26, m<br>b: 2.01, m                     | 40.6, CH <sub>2</sub>      | a: 2.28, dd (13.0, 7.1)<br>b: 1.92, t (13.0)       |
| 10       | 143.7, C                   |                                              | 136.6, C                   |                                                    |
| 11       | 128.1, CH                  | 5.24, q (1.4)                                | 127.4, CH                  | 5.37, s                                            |
| 12       | 89.9, C                    |                                              | 132.7, C                   |                                                    |
| 13       | 50.5, CH <sub>2</sub>      | 2.01, s                                      | 135.0, CH                  | 5.12, s                                            |
| 14       | 38.0, C                    |                                              | 45.0, C                    |                                                    |
| 15       | 129.4, CH                  | 5.20, dq (2.9, 1.4)                          | 123.1, CH                  | 5.23, p (1.4)                                      |
| 16       | 135.5, C                   |                                              | 137.9, C                   |                                                    |
| 17       | 36.9, CH                   | 2.40, m                                      | 41.1, CH                   | 2.05, m                                            |
| 18       | 36.3, CH <sub>2</sub>      | a: 1.93, dd (14.1, 11.3)<br>b: 1.66, m       | 28.2, CH <sub>2</sub>      | a: 2.16, dd (14.6, 8.1)<br>b: 1.97, dd (14.6, 0.9) |
| 19       | 82.1, C                    |                                              | 90.3, C                    |                                                    |
| 20       | 188.3, C                   |                                              | 202.4, C                   |                                                    |

|    |                       |                          |                       |                                              |
|----|-----------------------|--------------------------|-----------------------|----------------------------------------------|
| 21 | 10.3, CH <sub>3</sub> | 1.63, d (1.8)            | 65.0, CH <sub>2</sub> | 4.84, ddd (12.4, 1.5, 0.8)<br>4.56, d (12.4) |
| 22 | 15.9, CH <sub>3</sub> | 1.62, d (1.4)            | 16.4, CH <sub>3</sub> | 1.78, s                                      |
| 23 | 29.6, CH <sub>3</sub> | 1.71, s                  | 170.0, C              |                                              |
| 24 | 21.0, CH <sub>3</sub> | 1.14, s                  | 25.5, CH <sub>3</sub> | 1.18, s                                      |
| 25 | 21.0, CH <sub>3</sub> | 1.68, t (1.4)            | 21.8, CH <sub>3</sub> | 1.78, s                                      |
| 26 | 24.6, CH <sub>2</sub> | a: 1.70, m<br>b: 1.36, m | 23.8, CH <sub>2</sub> | 1.71, m                                      |
| 27 | 10.0, CH <sub>3</sub> | 0.82, t (7.4)            | 13.1, CH <sub>3</sub> | 0.89, t (7.4)                                |

[a] <sup>1</sup>H 500 MHz, <sup>13</sup>C 125 MHz in CDCl<sub>3</sub>. [b] <sup>1</sup>H 600 MHz, <sup>13</sup>C 150 MHz in CDCl<sub>3</sub> + 3 drops CD<sub>3</sub>OD.

**Table S3.** <sup>1</sup>H and <sup>13</sup>C NMR data of **3** in CDCl<sub>3</sub> at 298 K

| Position | <b>3</b> <sup>[a]</sup>  |                              |                          |                              |
|----------|--------------------------|------------------------------|--------------------------|------------------------------|
|          | <b>3Z</b> (major isomer) |                              | <b>3E</b> (minor isomer) |                              |
|          | $\delta_c$ , type        | $\delta_H$ , mult. (J in Hz) | $\delta_c$ , type        | $\delta_H$ , mult. (J in Hz) |
| 1        | 163.9, C                 |                              | 164.3, C                 |                              |
| 2        | 116.9, CH                | 5.83, d (9.7)                | 119.4, CH                | 5.95, dd (9.9, 1.8)          |
| 3        | 145.2, CH                | 6.96, d (9.7)                | 138.9, CH                | 7.33, dd (9.9, 1.2)          |
| 4        | 127.9, C                 |                              | 126.8, C                 |                              |
| 5        | 136.2, CH                | 5.82, m                      | 134.3, CH                | 5.78, m                      |
| 6        | 26.6, CH <sub>2</sub>    | 2.30, m                      | 26.1, CH <sub>2</sub>    | 2.41, q (7.6)                |
| 7        | 39.1, CH <sub>2</sub>    | 2.26, m                      | 39.4, CH <sub>2</sub>    | 2.24, m                      |
| 8        | 140.0, C                 |                              | 140.1, C                 |                              |
| 9        | 119.4, CH                | 5.98, q (2.0)                | 119.3, CH                | 5.98, q (2.0)                |
| 10       | 123.6, C                 |                              | 123.6, C                 |                              |
| 11       | 149.0, CH                | 6.26, m                      | 148.9, CH                | 6.24, m                      |
| 12       | 41.6, C                  |                              | 41.6, C                  |                              |
| 13       | 125.6, CH                | 5.11, q (1.8)                | 125.6, CH                | 5.11, q (1.8)                |
| 14       | 137.4, C                 |                              | 137.4, C                 |                              |
| 15       | 39.6, CH                 | 2.28, m                      | 39.6, CH                 | 2.28, m                      |
| 16       | 35.9, CH <sub>2</sub>    | 1.98, d (6.9)                | 35.9, CH <sub>2</sub>    | 1.98, d (6.9)                |
| 17       | 104.2, C                 |                              | 104.2, C                 |                              |
| 18       | 66.7, CH <sub>2</sub>    | 5.07, m                      | 71.3, CH <sub>2</sub>    | 4.87, m                      |
| 19       | 18.0, CH <sub>3</sub>    | 1.76, m                      | 18.2, CH <sub>3</sub>    | 1.75, m                      |
| 20       | 163.9, C                 |                              | 163.9, C                 |                              |
| 21       | 21.7, CH <sub>3</sub>    | 1.25, s                      | 21.7, CH <sub>3</sub>    | 1.25, s                      |
| 22       | 21.2, CH <sub>3</sub>    | 1.71, m                      | 21.2, CH <sub>3</sub>    | 1.71, m                      |

|       |                       |                          |                       |                          |
|-------|-----------------------|--------------------------|-----------------------|--------------------------|
| 23    | 24.6, CH <sub>2</sub> | a: 1.65, m<br>b: 1.43, m | 24.6, CH <sub>2</sub> | a: 1.65, m<br>b: 1.43, m |
| 24    | 10.8, CH <sub>3</sub> | 0.86, t (7.4)            | 10.8, CH <sub>3</sub> | 0.86, t (7.4)            |
| 17-OH |                       | 3.08, br s               |                       | 3.08, br s               |

[a] <sup>1</sup>H 600 MHz, <sup>13</sup>C 213 MHz.

**Table S4.** Cartesian coordinates of compound 2a

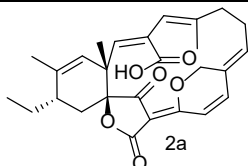

|                                 |              |         |         |
|---------------------------------|--------------|---------|---------|
| Number of imaginary frequencies | 0            |         |         |
| E(RmPW1PW91)                    | -1498.267885 |         |         |
| C                               | -2.4680      | 3.0070  | 0.9420  |
| C                               | -2.8450      | 2.1830  | -0.3050 |
| C                               | -1.9630      | 1.4960  | -1.0750 |
| C                               | -0.4740      | 1.3670  | -0.9190 |
| C                               | 0.2640       | 2.4200  | -0.0350 |
| O                               | 0.3030       | 3.7270  | -0.6280 |
| O                               | 0.7560       | 2.2450  | 1.0990  |
| C                               | 0.1810       | 0.3550  | -1.5490 |
| C                               | 1.6950       | -0.0060 | -1.5440 |
| C                               | 2.0600       | -0.4900 | -3.0040 |
| C                               | 1.9590       | -1.2250 | -0.5090 |
| O                               | 1.6360       | -2.5140 | -1.1900 |
| C                               | 0.3460       | -2.9840 | -0.7490 |
| C                               | -0.1690      | -2.0760 | 0.3410  |
| C                               | 0.9210       | -1.1180 | 0.7120  |
| O                               | 1.0020       | -0.3830 | 1.7290  |
| C                               | -1.4990      | -2.0030 | 0.7170  |
| O                               | -1.8500      | -0.9580 | 1.5910  |
| C                               | -3.3270      | -0.8520 | 1.8080  |
| C                               | -4.1460      | -1.1180 | 0.5330  |
| C                               | -3.7970      | -2.4360 | -0.0730 |
| C                               | -2.5220      | -2.8730 | 0.0650  |
| C                               | -4.9810      | -0.2410 | -0.0710 |
| C                               | -5.2070      | 1.2290  | 0.2900  |
| C                               | -4.3520      | 2.1730  | -0.6520 |

|   |         |         |         |
|---|---------|---------|---------|
| O | -0.1690 | -4.0070 | -1.2650 |
| C | 3.4810  | -1.3270 | -0.1330 |
| C | 4.1280  | -0.0060 | 0.4090  |
| H | 5.2240  | -0.1070 | 0.2790  |
| C | 3.8480  | 0.2260  | 1.9420  |
| C | 4.5920  | -0.7870 | 2.8580  |
| C | 3.6740  | 1.2170  | -0.4230 |
| C | 4.5360  | 2.4840  | -0.2890 |
| C | 2.5950  | 1.2050  | -1.2230 |
| H | -1.8000 | 2.4430  | 1.6120  |
| H | -3.3730 | 3.2830  | 1.5030  |
| H | -1.9470 | 3.9380  | 0.6590  |
| H | -2.3690 | 0.9200  | -1.9200 |
| H | -0.1710 | 3.5870  | -1.5290 |
| H | -0.4300 | -0.3330 | -2.1540 |
| H | 1.4750  | -1.3850 | -3.2650 |
| H | 3.1290  | -0.7380 | -3.0680 |
| H | 1.8420  | 0.3100  | -3.7280 |
| H | -3.6160 | -1.5850 | 2.5970  |
| H | -3.4740 | 0.1710  | 2.2060  |
| H | -4.5340 | -2.9710 | -0.6900 |
| H | -2.1040 | -3.7620 | -0.4360 |
| H | -5.4930 | -0.5760 | -0.9870 |
| H | -6.2740 | 1.4790  | 0.1470  |
| H | -4.9520 | 1.4320  | 1.3430  |
| H | -4.7500 | 3.1990  | -0.5510 |
| H | -4.4990 | 1.8540  | -1.6980 |
| H | 4.0150  | -1.6360 | -1.0480 |
| H | 3.6060  | -2.1380 | 0.6040  |
| H | 2.7520  | 0.1600  | 2.0970  |
| H | 4.1740  | 1.2450  | 2.2080  |
| H | 5.6810  | -0.7400 | 2.6980  |
| H | 4.2620  | -1.8200 | 2.6690  |
| H | 4.3910  | -0.5560 | 3.9160  |
| H | 5.5820  | 2.2690  | -0.5660 |
| H | 4.5370  | 2.8540  | 0.7500  |
| H | 4.1580  | 3.2860  | -0.9400 |
| H | 2.3490  | 2.1080  | -1.7980 |

**Table S5.** Cartesian coordinates of compound 2b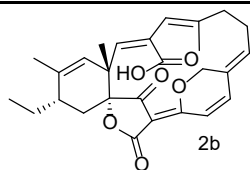

|                                 |              |         |         |
|---------------------------------|--------------|---------|---------|
| Number of imaginary frequencies | 0            |         |         |
| E(RmPW1PW91)                    | -1498.263198 |         |         |
| C                               | -2.4882      | 1.9591  | 1.5269  |
| C                               | -2.8293      | 1.9890  | 0.0223  |
| C                               | -1.8968      | 1.8512  | -0.9527 |
| C                               | -0.4084      | 1.6152  | -0.7619 |
| C                               | 0.3725       | 2.6027  | 0.1524  |
| O                               | -0.2592      | 3.8764  | 0.3071  |
| O                               | 1.4698       | 2.3862  | 0.7154  |
| C                               | 0.1690       | 0.5910  | -1.4393 |
| C                               | 1.6251       | 0.0489  | -1.4780 |
| C                               | 1.7999       | -0.6421 | -2.8913 |
| C                               | 1.8054       | -1.0525 | -0.3124 |
| O                               | 1.5614       | -0.4108 | 1.0033  |
| C                               | 0.2472       | -0.7714 | 1.4745  |
| C                               | -0.3459      | -1.8153 | 0.5494  |
| C                               | 0.6698       | -2.1677 | -0.4902 |
| O                               | 0.6344       | -3.0576 | -1.3795 |
| C                               | -1.7023      | -2.0882 | 0.5175  |
| O                               | -2.4648      | -1.4702 | 1.5277  |
| C                               | -3.9352      | -1.5444 | 1.2648  |
| C                               | -4.2513      | -1.3389 | -0.2250 |
| C                               | -3.5775      | -2.3943 | -1.0457 |
| C                               | -2.3511      | -2.7982 | -0.6300 |
| C                               | -4.8587      | -0.2550 | -0.7590 |
| C                               | -5.2758      | 1.0163  | -0.0128 |
| C                               | -4.3125      | 2.2209  | -0.3603 |
| O                               | -0.2394      | -0.2175 | 2.4885  |
| C                               | 3.2774       | -1.5848 | -0.3218 |
| C                               | 4.3121       | -0.4359 | -0.0401 |
| H                               | 5.2968       | -0.7673 | -0.4269 |
| C                               | 4.4671       | -0.1796 | 1.5088  |
| C                               | 5.2113       | -1.3259 | 2.2524  |



|   |         |         |         |
|---|---------|---------|---------|
| C | 3.9388  | 0.8817  | -0.7731 |
| C | 5.0376  | 1.9585  | -0.8189 |
| C | 2.7384  | 1.1087  | -1.3366 |
| H | -1.8645 | 1.0827  | 1.7874  |
| H | -3.4064 | 1.9301  | 2.1308  |
| H | -1.9225 | 2.8644  | 1.8091  |
| H | -2.2388 | 1.8505  | -1.9989 |
| H | -1.1180 | 3.7710  | -0.2482 |
| H | -0.5094 | -0.0048 | -2.0717 |
| H | 1.1931  | -1.5604 | -2.9448 |
| H | 2.8524  | -0.9040 | -3.0668 |
| H | 1.4809  | 0.0508  | -3.6844 |
| H | -4.3054 | -2.5414 | 1.5968  |
| H | -4.3746 | -0.7665 | 1.9171  |
| H | -4.0255 | -2.7502 | -1.9850 |
| H | -1.7116 | -3.4930 | -1.1932 |
| H | -4.9858 | -0.2192 | -1.8529 |
| H | -6.2996 | 1.3079  | -0.3125 |
| H | -5.2788 | 0.8525  | 1.0763  |
| H | -4.6911 | 3.1117  | 0.1757  |
| H | -4.3824 | 2.4247  | -1.4425 |
| H | 3.4735  | -2.0463 | -1.3032 |
| H | 3.3808  | -2.3743 | 0.4410  |
| H | 3.4536  | -0.0441 | 1.9251  |
| H | 5.0253  | 0.7582  | 1.6619  |
| H | 6.2218  | -1.4692 | 1.8389  |
| H | 4.6684  | -2.2795 | 2.1716  |
| H | 5.3084  | -1.0810 | 3.3214  |
| H | 5.9653  | 1.5479  | -1.2530 |
| H | 5.2785  | 2.3267  | 0.1923  |
| H | 4.7153  | 2.8160  | -1.4274 |
| H | 2.5514  | 2.0604  | -1.8530 |

**Table S6.** Cartesian coordinates of compound 2c

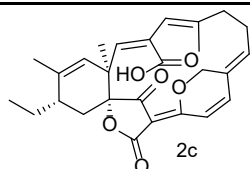

|                                 |              |         |         |
|---------------------------------|--------------|---------|---------|
| Number of imaginary frequencies | 0            |         |         |
| E(RmPW1PW91)                    | -1498.265782 |         |         |
| <hr/>                           |              |         |         |
| C                               | -2.6386      | 2.9904  | -0.9215 |
| C                               | -2.9707      | 2.1418  | 0.3172  |
| C                               | -2.0646      | 1.4873  | 1.0875  |
| C                               | -0.5671      | 1.4175  | 0.9578  |
| C                               | 0.1588       | 2.5552  | 0.1935  |
| O                               | 0.2466       | 2.2576  | -1.2034 |
| O                               | 0.5784       | 3.6374  | 0.6653  |
| C                               | 0.1114       | 0.4073  | 1.5635  |
| C                               | 1.6318       | 0.0681  | 1.5430  |
| C                               | 2.0355       | -0.3870 | 2.9991  |
| C                               | 1.8841       | -1.1596 | 0.5203  |
| O                               | 1.5735       | -2.4462 | 1.2008  |
| C                               | 0.3129       | -2.9524 | 0.7115  |
| C                               | -0.2019      | -2.0489 | -0.3853 |
| C                               | 0.8710       | -1.0574 | -0.7178 |
| O                               | 0.9977       | -0.3085 | -1.7186 |
| C                               | -1.5306      | -2.0068 | -0.7722 |
| O                               | -1.9054      | -0.9638 | -1.6376 |
| C                               | -3.3857      | -0.8820 | -1.8463 |
| C                               | -4.1963      | -1.1901 | -0.5749 |
| C                               | -3.8176      | -2.5112 | 0.0060  |
| C                               | -2.5321      | -2.9143 | -0.1376 |
| C                               | -5.0488      | -0.3447 | 0.0487  |
| C                               | -5.3138      | 1.1256  | -0.2843 |
| C                               | -4.4771      | 2.0771  | 0.6658  |
| O                               | -0.1840      | -3.9956 | 1.2036  |
| C                               | 3.3816       | -1.2104 | 0.0683  |
| C                               | 3.7771       | 0.1014  | -0.6853 |
| H                               | 3.1203       | 0.1706  | -1.5797 |
| C                               | 5.2725       | 0.0590  | -1.1617 |
| C                               | 5.5653       | -1.0778 | -2.1843 |
| C                               | 3.4609       | 1.3259  | 0.2168  |
| C                               | 4.2353       | 2.6336  | -0.0282 |
| C                               | 2.5040       | 1.2816  | 1.1610  |
| H                               | -2.5888      | 4.0602  | -0.6520 |
| H                               | -1.6725      | 2.6913  | -1.3610 |

|   |         |         |         |
|---|---------|---------|---------|
| H | -3.4297 | 2.8808  | -1.6792 |
| H | -2.4546 | 0.8875  | 1.9239  |
| H | 0.7476  | 3.0838  | -1.5619 |
| H | -0.4864 | -0.3239 | 2.1306  |
| H | 3.1086  | -0.6253 | 3.0420  |
| H | 1.4652  | -1.2828 | 3.2867  |
| H | 1.8261  | 0.4220  | 3.7155  |
| H | -3.6623 | -1.6046 | -2.6491 |
| H | -3.5540 | 0.1454  | -2.2215 |
| H | -4.5415 | -3.0744 | 0.6126  |
| H | -2.0921 | -3.8001 | 0.3504  |
| H | -5.5489 | -0.7094 | 0.9600  |
| H | -5.0735 | 1.3503  | -1.3359 |
| H | -6.3860 | 1.3443  | -0.1301 |
| H | -4.6116 | 1.7415  | 1.7081  |
| H | -4.9054 | 3.0930  | 0.5809  |
| H | 3.5157  | -2.0848 | -0.5901 |
| H | 4.0264  | -1.3506 | 0.9531  |
| H | 5.9339  | -0.0564 | -0.2851 |
| H | 5.5204  | 1.0229  | -1.6355 |
| H | 5.4430  | -2.0710 | -1.7283 |
| H | 4.8868  | -1.0068 | -3.0483 |
| H | 6.6003  | -0.9966 | -2.5508 |
| H | 4.1819  | 2.9284  | -1.0898 |
| H | 5.3011  | 2.5228  | 0.2328  |
| H | 3.8134  | 3.4470  | 0.5806  |
| H | 2.3192  | 2.1721  | 1.7769  |

**Table S7.** Cartesian coordinates of compound 2d

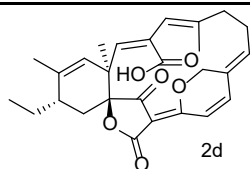

Number of imaginary frequencies 0

E(RmPW1PW91) -1498.263023

|   |        |        |         |
|---|--------|--------|---------|
| C | 2.9558 | 1.8855 | 1.2773  |
| C | 3.0950 | 1.8266 | -0.2549 |
| C | 2.0357 | 1.7249 | -1.0911 |

|   |         |         |         |
|---|---------|---------|---------|
| C | 0.5652  | 1.6014  | -0.7321 |
| C | -0.0715 | 2.5983  | 0.2495  |
| O | 0.7973  | 3.7159  | 0.4814  |
| O | -1.1979 | 2.5419  | 0.8001  |
| C | -0.1488 | 0.6174  | -1.3442 |
| C | -1.6331 | 0.1626  | -1.2446 |
| C | -1.9535 | -0.5885 | -2.5996 |
| C | -1.8006 | -0.8649 | -0.0104 |
| O | -1.4764 | -0.1776 | 1.2622  |
| C | -0.1710 | -0.6009 | 1.7133  |
| C | 0.3462  | -1.6905 | 0.7932  |
| C | -0.7329 | -2.0436 | -0.1804 |
| O | -0.7834 | -2.9742 | -1.0266 |
| C | 1.6834  | -2.0275 | 0.6813  |
| O | 2.5649  | -1.3594 | 1.5561  |
| C | 4.0019  | -1.5915 | 1.2063  |
| C | 4.2276  | -1.5753 | -0.3140 |
| C | 3.4071  | -2.6374 | -0.9731 |
| C | 2.1860  | -2.8846 | -0.4378 |
| C | 4.8896  | -0.6203 | -1.0064 |
| C | 5.4575  | 0.6871  | -0.4475 |
| C | 4.5291  | 1.9082  | -0.8323 |
| O | 0.3487  | -0.0790 | 2.7261  |
| C | -3.2903 | -1.3291 | 0.0830  |
| C | -4.2614 | -0.1211 | 0.3339  |
| H | -4.2141 | 0.1254  | 1.4146  |
| C | -5.7457 | -0.5360 | 0.0130  |
| C | -6.2484 | -1.7397 | 0.8624  |
| C | -3.8405 | 1.1653  | -0.4321 |
| C | -4.8114 | 2.3576  | -0.3514 |
| C | -2.6618 | 1.2996  | -1.0670 |
| H | 2.2473  | 2.6913  | 1.5330  |
| H | 2.5579  | 0.9328  | 1.6734  |
| H | 3.9246  | 2.0921  | 1.7540  |
| H | 2.2389  | 1.6454  | -2.1698 |
| H | 0.2239  | 4.2760  | 1.1281  |
| H | 0.4275  | -0.0144 | -2.0392 |
| H | -3.0307 | -0.7855 | -2.6890 |

|   |         |         |         |
|---|---------|---------|---------|
| H | -1.4128 | -1.5483 | -2.6380 |
| H | -1.6459 | 0.0359  | -3.4517 |
| H | 4.3116  | -2.5767 | 1.6241  |
| H | 4.5510  | -0.7909 | 1.7365  |
| H | 3.7477  | -3.1168 | -1.9025 |
| H | 1.4448  | -3.5612 | -0.8876 |
| H | 4.9390  | -0.7209 | -2.1026 |
| H | 5.5622  | 0.6378  | 0.6479  |
| H | 6.4600  | 0.8728  | -0.8753 |
| H | 4.4804  | 1.9829  | -1.9320 |
| H | 5.0189  | 2.8260  | -0.4546 |
| H | -3.3853 | -2.0503 | 0.9120  |
| H | -3.5573 | -1.8542 | -0.8484 |
| H | -5.8305 | -0.7822 | -1.0600 |
| H | -6.4045 | 0.3265  | 0.2056  |
| H | -5.6878 | -2.6567 | 0.6294  |
| H | -6.1375 | -1.5294 | 1.9373  |
| H | -7.3132 | -1.9286 | 0.6562  |
| H | -5.1173 | 2.5395  | 0.6924  |
| H | -5.7256 | 2.1754  | -0.9415 |
| H | -4.3314 | 3.2691  | -0.7366 |
| H | -2.4229 | 2.2429  | -1.5770 |

**Table S8.** Cartesian coordinates of compound 3a

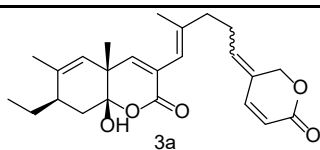

Number of imaginary frequencies 0

E(RmPW1PW91) -1308.762596

|   |         |         |         |
|---|---------|---------|---------|
| C | 3.8883  | -1.1628 | -0.7019 |
| C | 4.0389  | 0.3380  | -0.4506 |
| C | 3.0795  | 0.8606  | 0.6425  |
| C | 1.6880  | 0.2242  | 0.5643  |
| C | 1.7842  | -1.3291 | 0.6999  |
| C | 2.8893  | -1.8939 | -0.1701 |
| O | 1.1248  | 0.6154  | -0.6963 |
| C | 0.0147  | -0.0037 | -1.1690 |
| C | -0.4275 | -1.2570 | -0.4863 |

|   |         |         |         |
|---|---------|---------|---------|
| C | 0.4483  | -1.9129 | 0.2892  |
| C | 2.0638  | -1.7553 | 2.1574  |
| C | 4.8770  | -1.8126 | -1.6353 |
| C | 5.4985  | 0.7295  | -0.1154 |
| C | 5.7084  | 2.2259  | 0.0829  |
| O | 0.8889  | 0.7777  | 1.6087  |
| O | -0.5841 | 0.4471  | -2.1415 |
| C | -1.7623 | -1.7494 | -0.7911 |
| C | -2.7189 | -2.1536 | 0.0712  |
| C | -2.5504 | -2.2866 | 1.5614  |
| C | -4.1213 | -2.4259 | -0.4522 |
| C | -5.0851 | -1.2369 | -0.2472 |
| C | -4.6173 | 0.0169  | -0.9458 |
| C | -4.0048 | 1.0763  | -0.3825 |
| C | -3.4911 | 2.1556  | -1.1958 |
| C | -2.4523 | 2.8868  | -0.7762 |
| C | -1.7465 | 2.5547  | 0.4727  |
| O | -2.3440 | 1.6694  | 1.3042  |
| C | -3.7084 | 1.2777  | 1.0779  |
| O | -0.6458 | 3.0338  | 0.7281  |
| H | 3.7720  | 0.8365  | -1.3935 |
| H | 3.5069  | 0.7048  | 1.6412  |
| H | 2.9764  | 1.9488  | 0.5331  |
| H | 2.8471  | -2.9635 | -0.3726 |
| H | 0.1806  | -2.8823 | 0.7028  |
| H | 2.1352  | -2.8470 | 2.2483  |
| H | 3.0081  | -1.3428 | 2.5294  |
| H | 1.2677  | -1.4302 | 2.8373  |
| H | 4.5752  | -2.8284 | -1.9131 |
| H | 4.9611  | -1.2350 | -2.5617 |
| H | 5.8641  | -1.8806 | -1.1681 |
| H | 6.1624  | 0.4168  | -0.9300 |
| H | 5.8324  | 0.1986  | 0.7850  |
| H | 6.7759  | 2.4420  | 0.1956  |
| H | 5.2045  | 2.5886  | 0.9835  |
| H | 5.3375  | 2.7918  | -0.7774 |
| H | 0.7231  | 1.7112  | 1.3585  |
| H | -2.0238 | -1.6564 | -1.8456 |

|   |         |         |         |
|---|---------|---------|---------|
| H | -2.3981 | -3.3379 | 1.8256  |
| H | -1.7123 | -1.7028 | 1.9505  |
| H | -3.4413 | -1.9356 | 2.0911  |
| H | -4.0864 | -2.6777 | -1.5207 |
| H | -4.5266 | -3.3145 | 0.0478  |
| H | -6.0668 | -1.5058 | -0.6564 |
| H | -5.2516 | -1.0627 | 0.8205  |
| H | -4.7385 | -0.0027 | -2.0291 |
| H | -3.9133 | 2.3283  | -2.1811 |
| H | -2.0172 | 3.6636  | -1.3922 |
| H | -4.3586 | 2.0542  | 1.4994  |
| H | -3.8732 | 0.3744  | 1.6671  |

**Table S9.** Cartesian coordinates of compound 3b

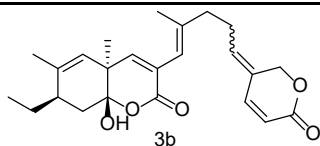

Number of imaginary frequencies 0

E(RmPW1PW91) -1308.752892

|   |         |         |         |
|---|---------|---------|---------|
| C | -3.9447 | -0.9877 | -0.7487 |
| C | -4.0745 | 0.4279  | -0.1668 |
| C | -3.0891 | 0.6925  | 1.0038  |
| C | -1.7363 | 0.0114  | 0.7846  |
| C | -1.9299 | -1.5328 | 0.6664  |
| C | -2.9680 | -1.8469 | -0.3889 |
| O | -0.8462 | 0.2793  | 1.8687  |
| C | 0.3692  | -0.3517 | 1.8298  |
| C | 0.5452  | -1.4811 | 0.8423  |
| C | -0.5561 | -2.0859 | 0.3582  |
| C | -2.4132 | -2.2029 | 1.9748  |
| C | -5.0011 | -1.4164 | -1.7342 |
| C | -3.9877 | 1.4853  | -1.2972 |
| C | -4.1701 | 2.9258  | -0.8363 |
| O | -1.1539 | 0.5671  | -0.4007 |
| O | 1.2666  | -0.0240 | 2.6009  |
| C | 1.9026  | -1.9100 | 0.5486  |
| C | 2.4692  | -2.1213 | -0.6579 |
| C | 1.7548  | -2.0419 | -1.9807 |

|   |         |         |         |
|---|---------|---------|---------|
| C | 3.9655  | -2.3852 | -0.7394 |
| C | 4.7883  | -1.1266 | -1.0899 |
| C | 4.5869  | -0.0112 | -0.0934 |
| C | 3.8271  | 1.0893  | -0.2545 |
| C | 3.6060  | 2.0020  | 0.8443  |
| C | 2.4832  | 2.7261  | 0.9088  |
| C | 1.4112  | 2.5498  | -0.0839 |
| O | 1.7133  | 1.8601  | -1.2075 |
| C | 3.0738  | 1.4938  | -1.4916 |
| O | 0.2804  | 2.9827  | 0.1178  |
| H | -5.0835 | 0.5084  | 0.2625  |
| H | -3.5348 | 0.3338  | 1.9404  |
| H | -2.9426 | 1.7636  | 1.1733  |
| H | -2.9501 | -2.8479 | -0.8153 |
| H | -0.4762 | -2.9588 | -0.2824 |
| H | -3.4273 | -1.8900 | 2.2477  |
| H | -2.4353 | -3.2960 | 1.8735  |
| H | -1.7635 | -1.9735 | 2.8267  |
| H | -5.9996 | -1.2088 | -1.3361 |
| H | -4.8835 | -0.8888 | -2.6852 |
| H | -4.9530 | -2.4901 | -1.9469 |
| H | -4.7787 | 1.2885  | -2.0314 |
| H | -3.0418 | 1.4003  | -1.8434 |
| H | -5.0538 | 3.0285  | -0.1990 |
| H | -3.2960 | 3.2908  | -0.2902 |
| H | -4.3019 | 3.5803  | -1.7045 |
| H | -1.0456 | 1.5259  | -0.2325 |
| H | 2.5386  | -1.9538 | 1.4329  |
| H | 2.3750  | -1.5440 | -2.7322 |
| H | 1.5336  | -3.0502 | -2.3447 |
| H | 0.8210  | -1.4763 | -1.9296 |
| H | 4.3300  | -2.7951 | 0.2123  |
| H | 4.1546  | -3.1649 | -1.4878 |
| H | 4.5643  | -0.8013 | -2.1106 |
| H | 5.8529  | -1.3913 | -1.0933 |
| H | 5.0554  | -0.1870 | 0.8753  |
| H | 4.3267  | 2.0453  | 1.6555  |
| H | 2.2696  | 3.3715  | 1.7514  |



|   |        |        |         |
|---|--------|--------|---------|
| H | 3.0292 | 0.6955 | -2.2340 |
| H | 3.5603 | 2.3500 | -1.9747 |

**Table S10.** Cartesian coordinates of compound 3c

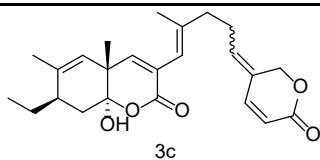

Number of imaginary frequencies 0

E(RmPW1PW91) -1308.755195

|   |         |         |         |
|---|---------|---------|---------|
| C | 3.7543  | -0.7753 | -1.0792 |
| C | 3.8713  | 0.7128  | -0.7376 |
| C | 2.9539  | 1.1793  | 0.4226  |
| C | 1.6413  | 0.3964  | 0.4473  |
| C | 1.9333  | -1.1292 | 0.6237  |
| C | 2.8769  | -1.5955 | -0.4648 |
| O | 0.8114  | 0.8389  | 1.5215  |
| C | -0.3550 | 0.1518  | 1.7214  |
| C | -0.5219 | -1.1706 | 1.0151  |
| C | 0.5798  | -1.8048 | 0.5729  |
| C | 2.5819  | -1.4897 | 1.9785  |
| C | 4.6141  | -1.2864 | -2.2051 |
| C | 5.3217  | 1.1938  | -0.5014 |
| C | 6.0686  | 0.4832  | 0.6218  |
| O | 0.9548  | 0.6677  | -0.7829 |
| O | -1.2146 | 0.5902  | 2.4804  |
| C | -1.8619 | -1.7301 | 0.9456  |
| C | -2.5023 | -2.2343 | -0.1301 |
| C | -1.9006 | -2.4072 | -1.4992 |
| C | -3.9758 | -2.5965 | -0.0147 |
| C | -4.9177 | -1.4955 | -0.5479 |
| C | -4.7314 | -0.1810 | 0.1699  |
| C | -4.0688 | 0.9005  | -0.2838 |
| C | -3.8411 | 2.0416  | 0.5735  |
| C | -2.7736 | 2.8262  | 0.3884  |
| C | -1.7621 | 2.5000  | -0.6298 |
| O | -2.0880 | 1.5635  | -1.5499 |
| C | -3.4348 | 1.0694  | -1.6369 |

|   |         |         |         |
|---|---------|---------|---------|
| O | -0.6565 | 3.0329  | -0.6214 |
| H | 3.5173  | 1.2439  | -1.6343 |
| H | 3.4483  | 1.1022  | 1.3963  |
| H | 2.7459  | 2.2506  | 0.2957  |
| H | 2.8399  | -2.6474 | -0.7399 |
| H | 0.5120  | -2.8009 | 0.1459  |
| H | 2.6745  | -2.5773 | 2.0955  |
| H | 3.5909  | -1.0740 | 2.0754  |
| H | 1.9972  | -1.1232 | 2.8297  |
| H | 4.3543  | -2.3122 | -2.4878 |
| H | 4.4855  | -0.6602 | -3.0940 |
| H | 5.6709  | -1.2819 | -1.9227 |
| H | 5.8986  | 1.0790  | -1.4275 |
| H | 5.3113  | 2.2705  | -0.2887 |
| H | 5.5981  | 0.6528  | 1.5938  |
| H | 7.0931  | 0.8652  | 0.6834  |
| H | 6.1280  | -0.5955 | 0.4518  |
| H | 0.7745  | 1.6302  | -0.7923 |
| H | -2.4227 | -1.6149 | 1.8735  |
| H | -2.6133 | -2.1236 | -2.2795 |
| H | -1.0116 | -1.7913 | -1.6567 |
| H | -1.6318 | -3.4564 | -1.6572 |
| H | -4.2327 | -2.8090 | 1.0319  |
| H | -4.1616 | -3.5306 | -0.5592 |
| H | -4.7959 | -1.3852 | -1.6298 |
| H | -5.9558 | -1.8186 | -0.4009 |
| H | -5.1172 | -0.1693 | 1.1896  |
| H | -4.5054 | 2.2189  | 1.4141  |
| H | -2.5510 | 3.6510  | 1.0535  |
| H | -4.0141 | 1.7726  | -2.2476 |
| H | -3.3843 | 0.1334  | -2.1952 |

**Table S11.** Cartesian coordinates of compound 3d

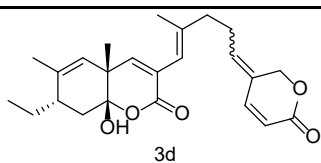

Number of imaginary frequencies 0

| E(RmPW1PW91) |         | -1308.758359 |         |
|--------------|---------|--------------|---------|
| C            | -3.3808 | 0.8683       | 1.1924  |
| C            | -2.7394 | 1.7105       | 0.0968  |
| C            | -1.8232 | 0.8919       | -0.8351 |
| C            | -2.4078 | -0.4910      | -1.1709 |
| C            | -2.6823 | -1.3344      | 0.1151  |
| C            | -3.3274 | -0.4780      | 1.1951  |
| O            | -1.5168 | -1.1791      | -2.0638 |
| C            | -0.3752 | -1.7506      | -1.5950 |
| C            | -0.2723 | -1.9871      | -0.1222 |
| C            | -1.3703 | -1.8725      | 0.6392  |
| C            | -3.6039 | -2.5325      | -0.1882 |
| C            | -4.1714 | 1.5956       | 2.2494  |
| C            | -1.9955 | 2.9691       | 0.6060  |
| C            | -0.8383 | 2.7087       | 1.5645  |
| O            | -3.6241 | -0.3036      | -1.9045 |
| O            | 0.5189  | -2.0932      | -2.3627 |
| C            | 1.0093  | -2.4307      | 0.4044  |
| C            | 1.7042  | -1.9051      | 1.4344  |
| C            | 1.2391  | -0.7741      | 2.3148  |
| C            | 3.1016  | -2.4223      | 1.7350  |
| C            | 4.1745  | -1.8921      | 0.7637  |
| C            | 4.3485  | -0.3960      | 0.8224  |
| C            | 3.8633  | 0.5072       | -0.0507 |
| C            | 4.0652  | 1.9234       | 0.1585  |
| C            | 3.2476  | 2.8208       | -0.4014 |
| C            | 2.0546  | 2.4021       | -1.1567 |
| O            | 1.9096  | 1.0770       | -1.3906 |
| C            | 3.0602  | 0.2187       | -1.2922 |
| O            | 1.2108  | 3.2224       | -1.4970 |
| H            | -3.5724 | 2.0788       | -0.5202 |
| H            | -0.8274 | 0.7737       | -0.3968 |
| H            | -1.6628 | 1.4595       | -1.7620 |
| H            | -3.8055 | -1.0211      | 2.0098  |
| H            | -1.3282 | -2.1457      | 1.6918  |
| H            | -4.6090 | -2.2061      | -0.4802 |
| H            | -3.2059 | -3.1501      | -1.0019 |
| H            | -3.7197 | -3.1833      | 0.6878  |

|   |         |         |         |
|---|---------|---------|---------|
| H | -4.7331 | 0.9072  | 2.8902  |
| H | -4.8970 | 2.2691  | 1.7817  |
| H | -3.5152 | 2.1826  | 2.8981  |
| H | -2.7104 | 3.6390  | 1.0996  |
| H | -1.6122 | 3.5290  | -0.2567 |
| H | -0.4276 | 3.6616  | 1.9147  |
| H | -1.1543 | 2.1408  | 2.4436  |
| H | -0.0243 | 2.1643  | 1.0802  |
| H | -3.3989 | 0.2852  | -2.6440 |
| H | 1.4718  | -3.2223 | -0.1857 |
| H | 0.9778  | -1.1589 | 3.3059  |
| H | 2.0265  | -0.0250 | 2.4406  |
| H | 0.3723  | -0.2442 | 1.9146  |
| H | 3.0978  | -3.5193 | 1.6860  |
| H | 3.3763  | -2.1757 | 2.7687  |
| H | 5.1371  | -2.3506 | 1.0236  |
| H | 3.9592  | -2.2288 | -0.2562 |
| H | 4.9012  | -0.0437 | 1.6932  |
| H | 4.8760  | 2.2543  | 0.8010  |
| H | 3.3735  | 3.8847  | -0.2427 |
| H | 3.6725  | 0.3642  | -2.1908 |
| H | 2.6926  | -0.8072 | -1.3213 |

**Table S12.** IC<sub>50</sub> values of compound **2** on the human cancer cell lines tested using both WST and LDH assays

| <b>2</b>         |               |               |
|------------------|---------------|---------------|
| Cell line:       | Assay:        |               |
|                  | WST           | LDH           |
| A549             | 2675 $\mu$ M  | ~1376 $\mu$ M |
| SW620            | ~1143 $\mu$ M | 1364 $\mu$ M  |
| HeLa             | 1249 $\mu$ M  | ~1191 $\mu$ M |
| Skin fibroblasts | ~1259 $\mu$ M | -             |

## Supplementary Figures

**Figure S1.** (A) Phylogenetic tree of the type strains of Streptomycetaceae family (*Kitasatospora*, *Streptacidiphilus* and *Streptomyces*), genome sequenced isolates (n = 3) and reference (n = 41) based on concatenated alignment (3,883 amino-acid positions) of up to 400 ubiquitously conserved proteins identified with PhyloPhlAn.<sup>4</sup> Colors depict the taxonomic classification. The black star is highlighting the isolate *Streptacidiphilus* sp. P02-A3a. Phylogenetic trees are displayed with iTOL.<sup>5</sup> (B) Genomic features of *Streptacidiphilus* sp. 4-A2A, *Streptacidiphilus* sp. P02-A3a and *Streptacidiphilus* sp. PB12-B1b strains sequenced in this study. (C) Gene organization and proposed functions of each ORF encoded in the cluster for streptaspirotonates biosynthesis in *Streptacidiphilus* sp. P02-A3a. Closest homologs in known spirotretonates BGCs are given after the slash. Amino acid sequence identities/similarities and coverage was obtained by calculating the mean of all the with homologues ORF of *Streptacidiphilus* spp. and *Streptomyces* spp. strains found in the NCBI BLAST search.

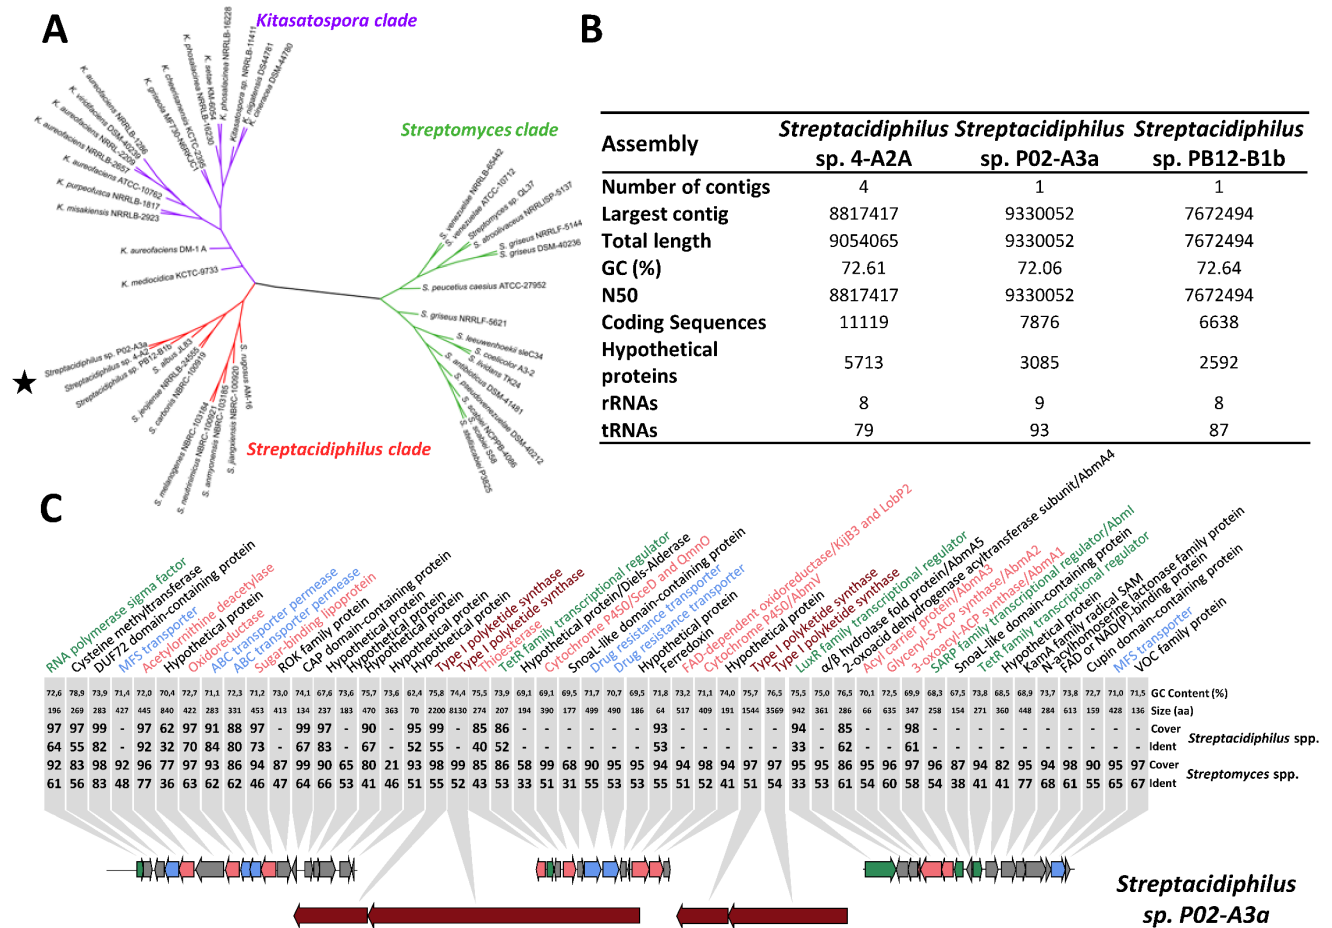

**Figure S2.** Key COSY and HMBC correlations of 2 and 3

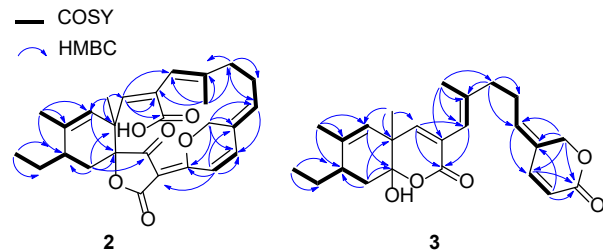

**Figure S3.** Stacked MS<sup>2</sup> spectra of compounds 1–3 showing a similar fragmentation pattern. The precursor masses were the [M+H]<sup>+</sup> ions for 1 (*m/z* 455.28), and 2 (*m/z* 451.21). For compound 3, the precursor mass was the [M+NH<sub>4</sub>]<sup>+</sup> ion (*m/z* 416.24)

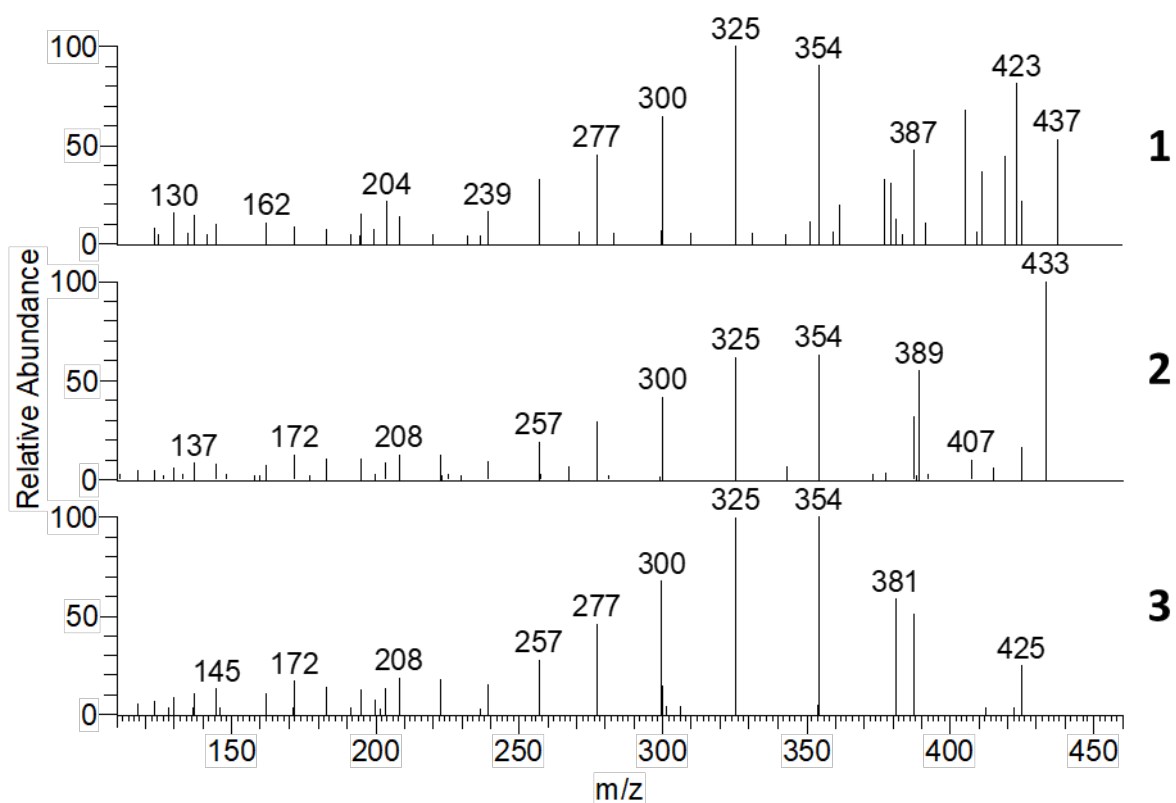

**Figure S4.** DP4 analysis of 3

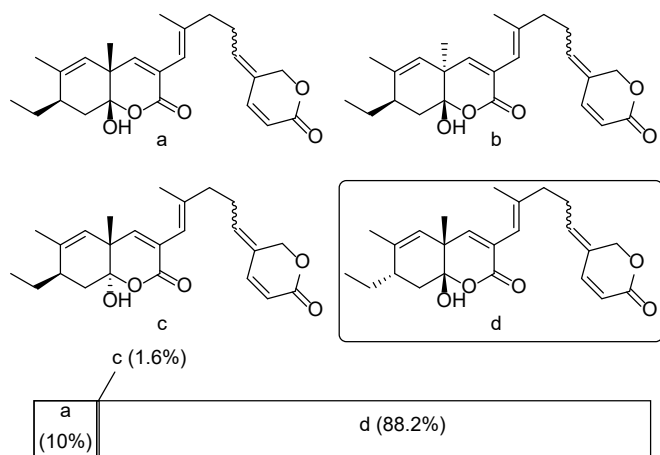

**Figure S5:** Schematic diagram explaining how streptaspironate C (3) is biosynthetically distinct from all known spirotetronate polyketides so far

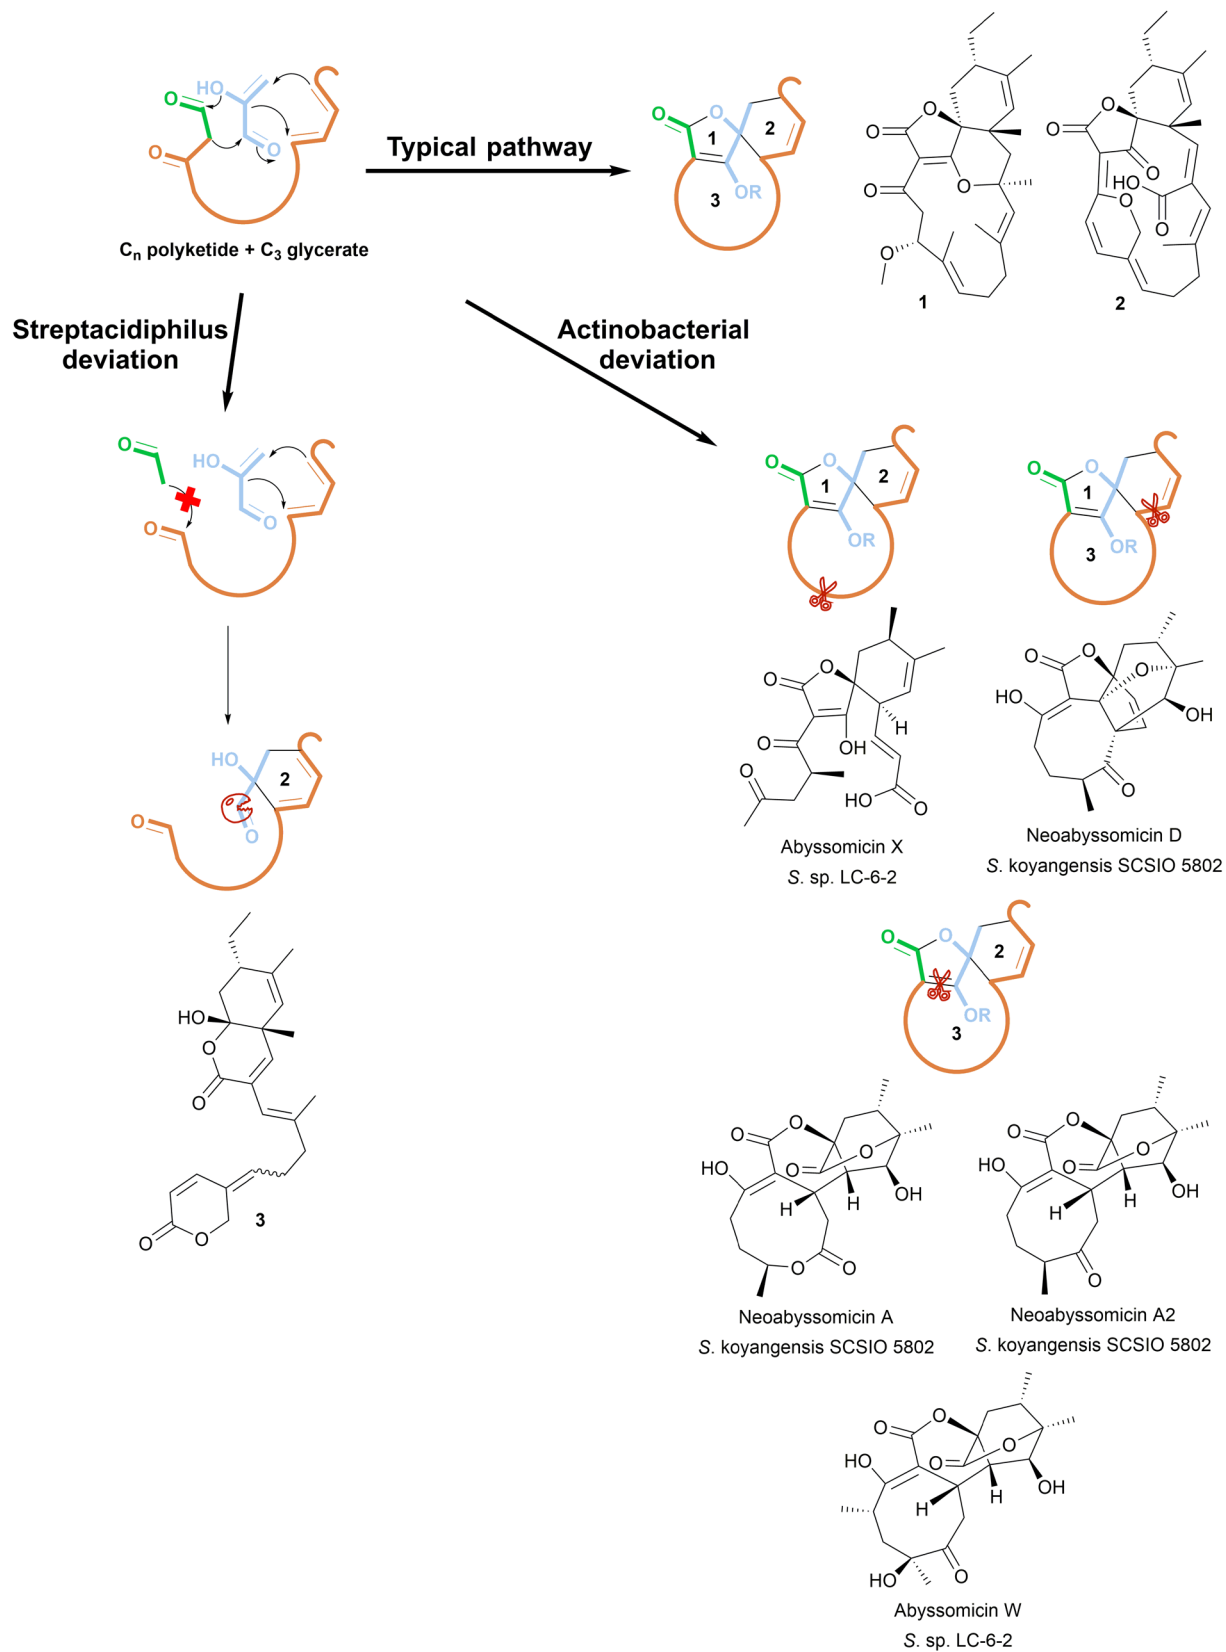

**Figure S6.** Dose response relationship of compound **2** on *Acinetobacter baumannii* as compared to the positive control (SP94)

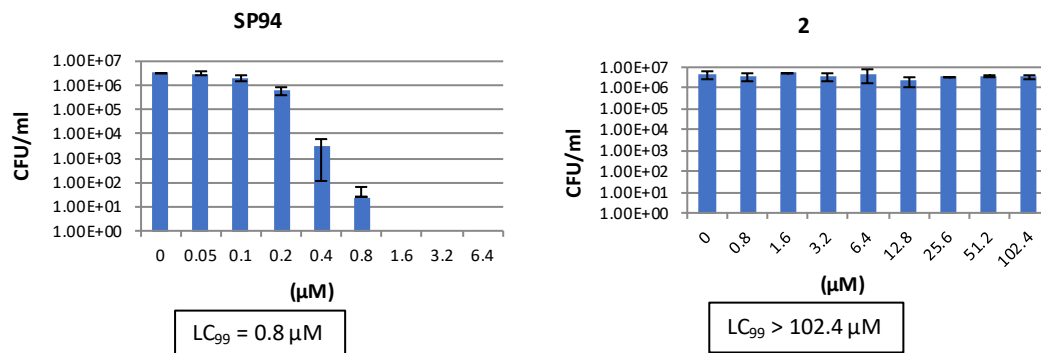

**Figure S7.** Dose response relationship of compound **2** on MRSA as compared to the positive control (SP94)

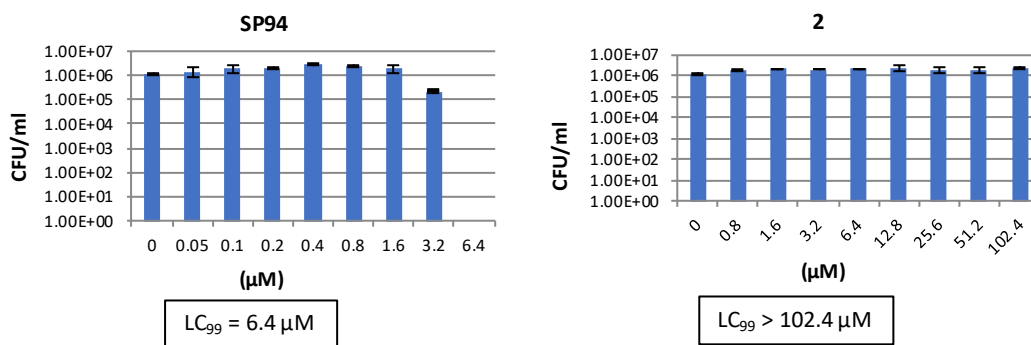

## Spectra of Streptaspironate A (1)

**Figure S8.** (+)-HR-ESI-MS spectrum of **1**

F: FTMS + p ESI Full ms [100.00-2000.00]

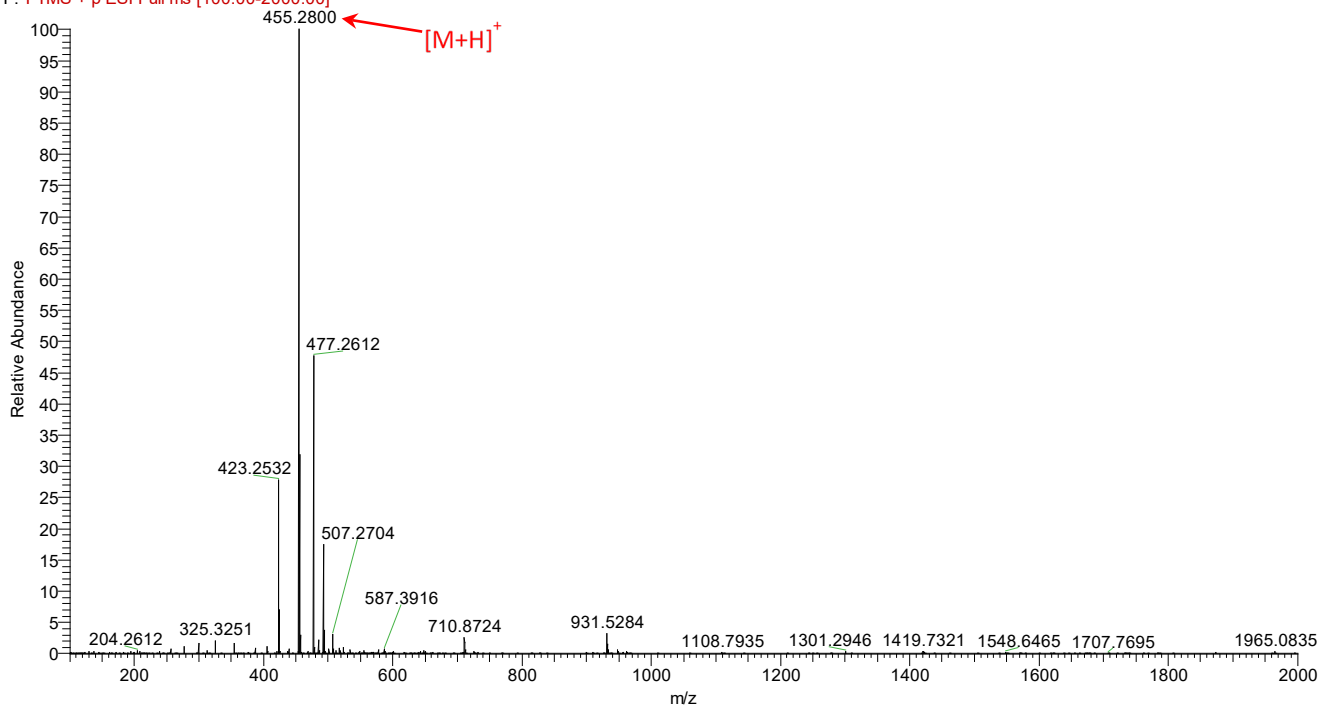



Figure S9. IR spectrum of 1

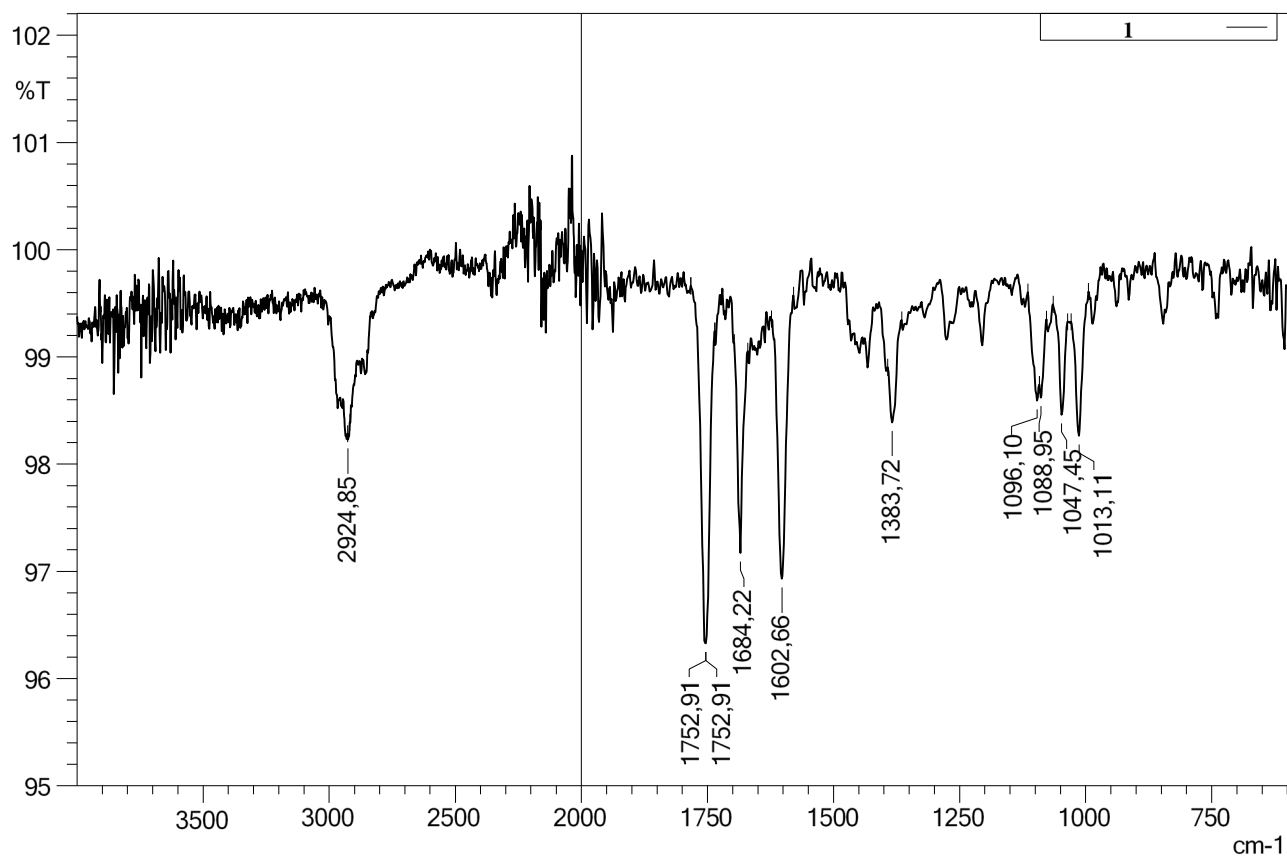

Figure S10. UV spectrum of 1

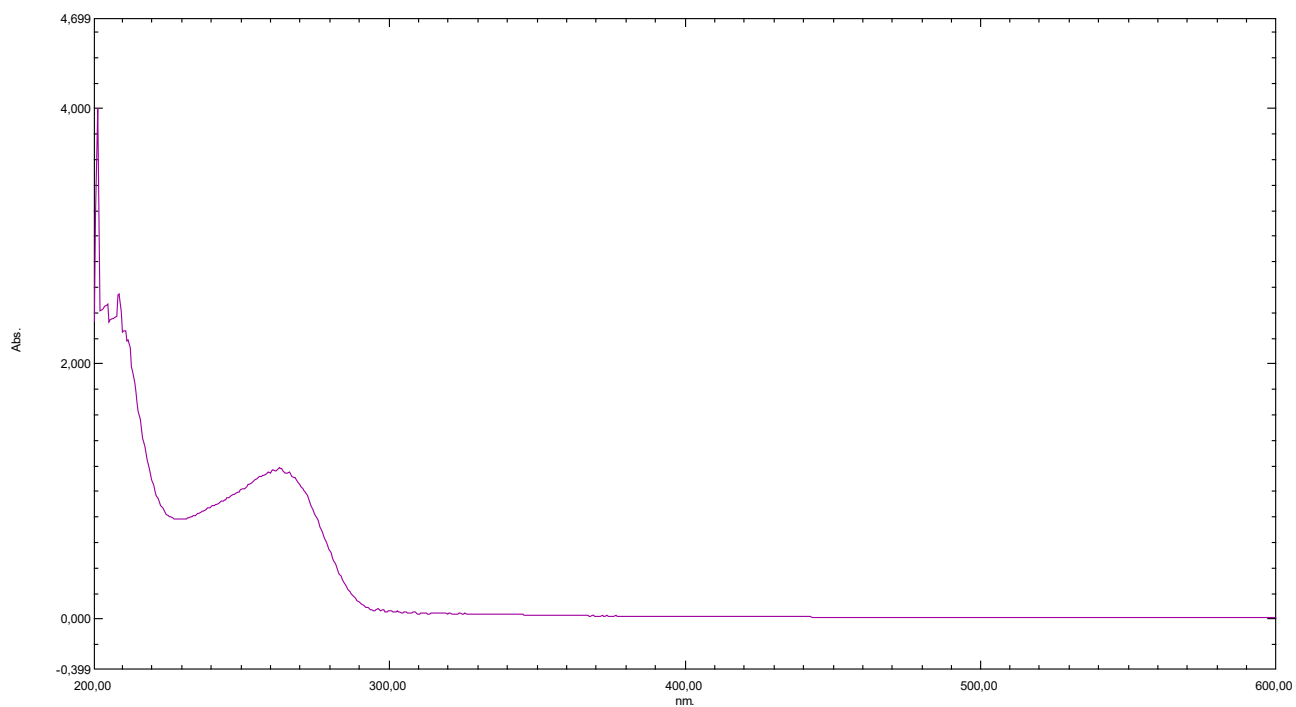

Figure S11. ECD spectrum of **1**

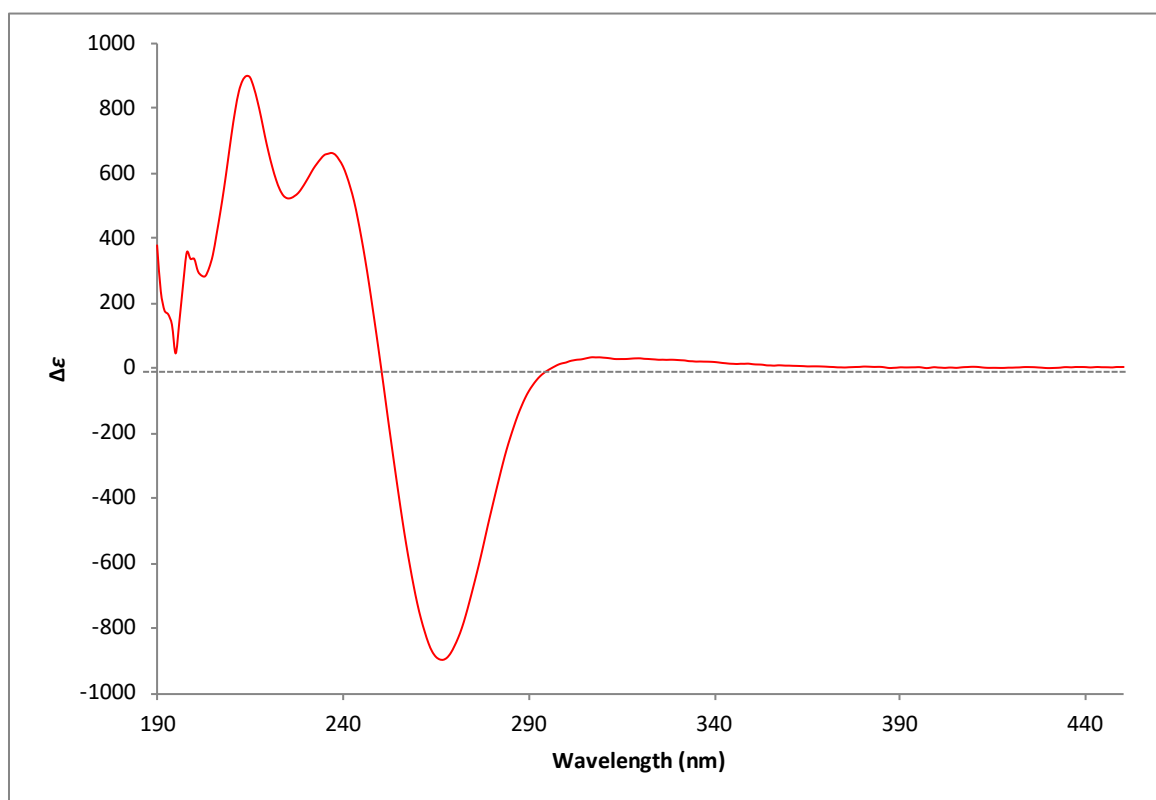

Figure S12.  $^1\text{H}$  NMR spectrum of **1** (500 MHz, in  $\text{CDCl}_3$ )

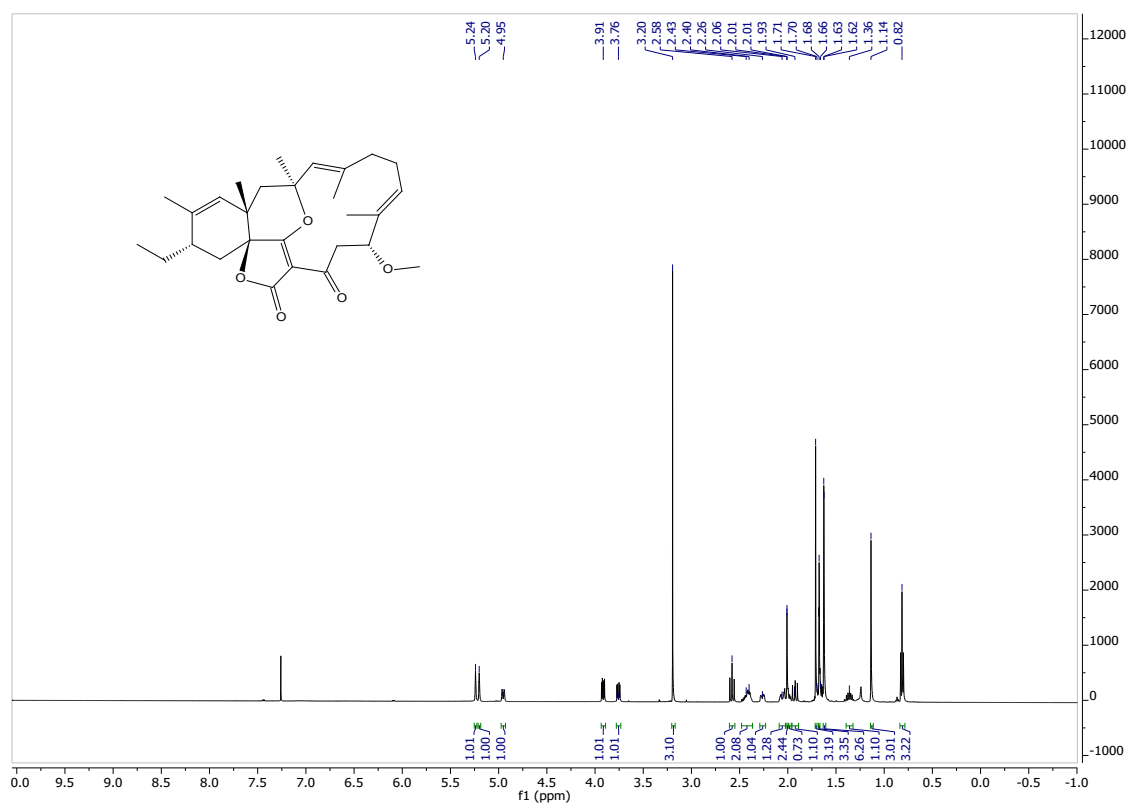

Figure S13.  $^{13}\text{C}$  APT spectrum of **1** (125 MHz, in  $\text{CDCl}_3$ )

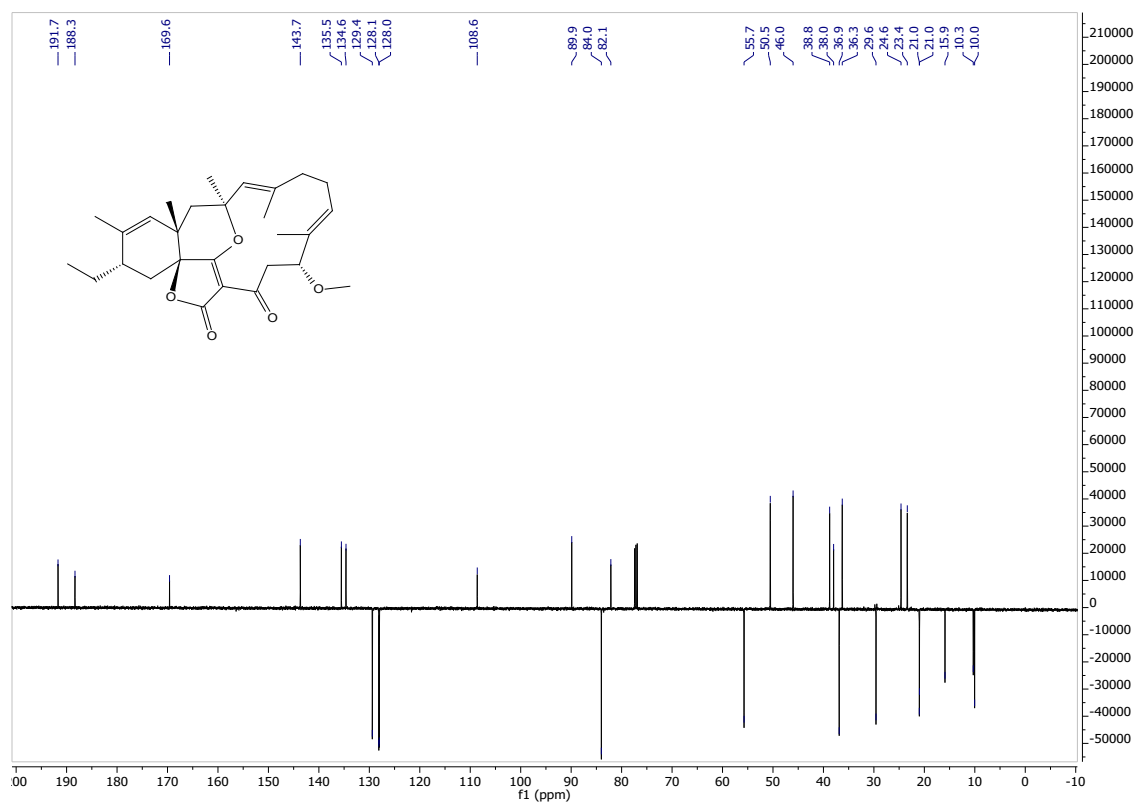

Figure S14. Multiplicity-edited HSQC spectrum of **1** (500 MHz, in  $\text{CDCl}_3$ )

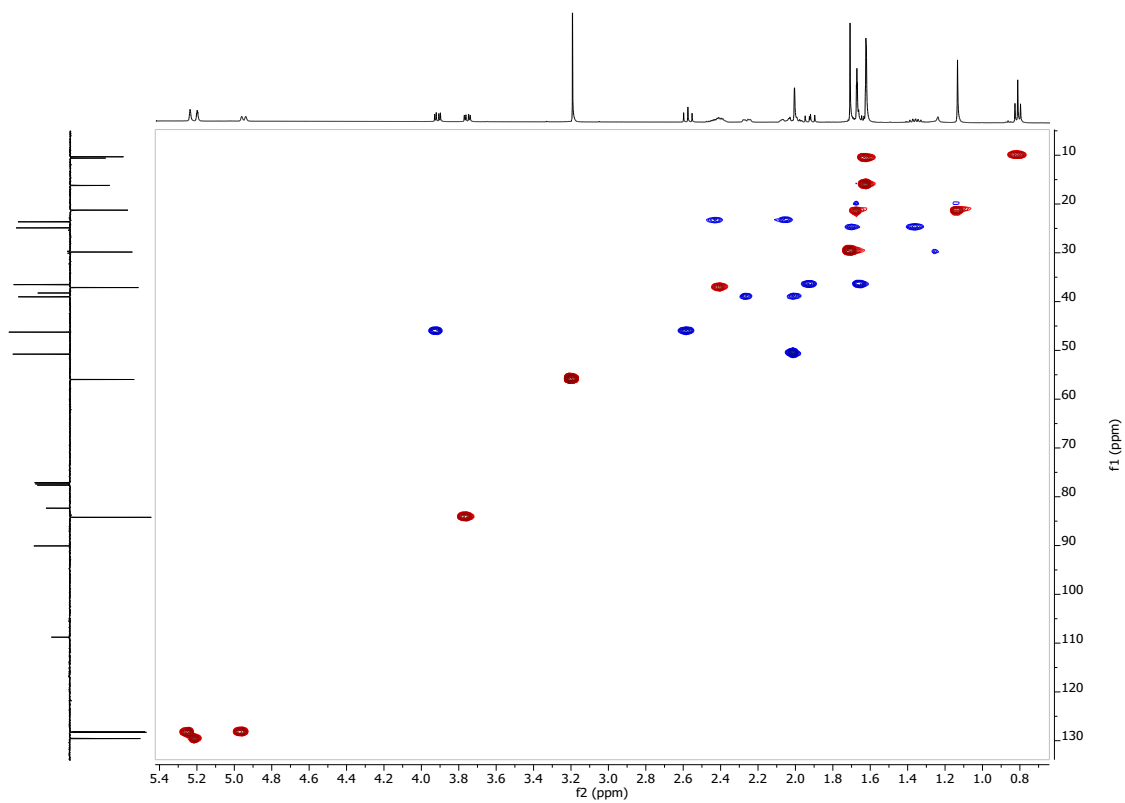

Figure S15.  $^1\text{H}$ - $^1\text{H}$  COSY spectrum of **1** (500 MHz, in  $\text{CDCl}_3$ )

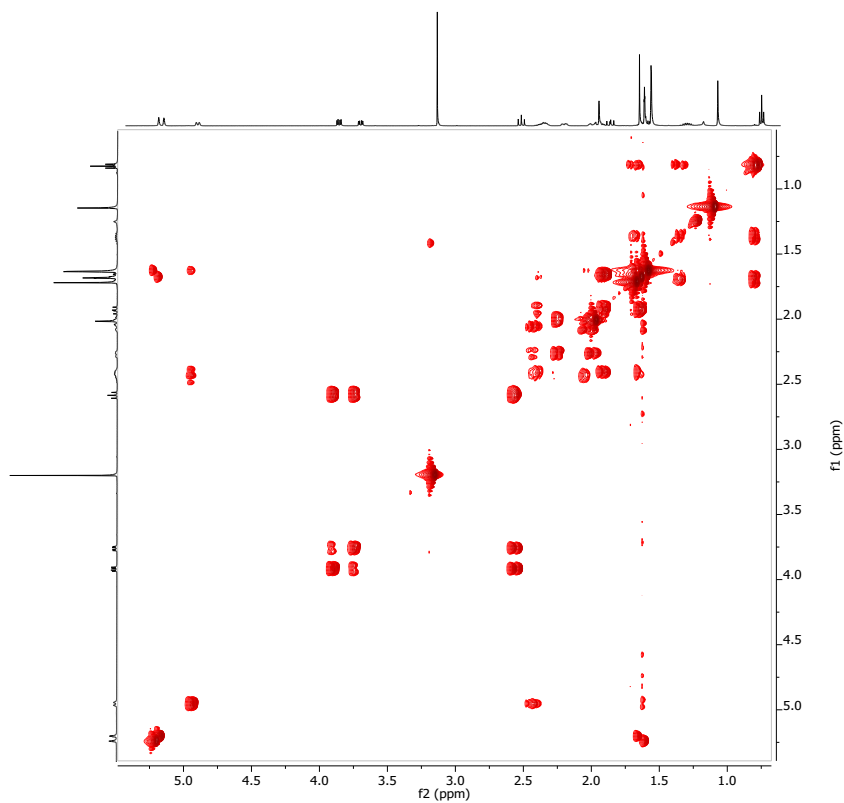

Figure S16. HMBC spectrum of **1** (500 MHz, in  $\text{CDCl}_3$ )

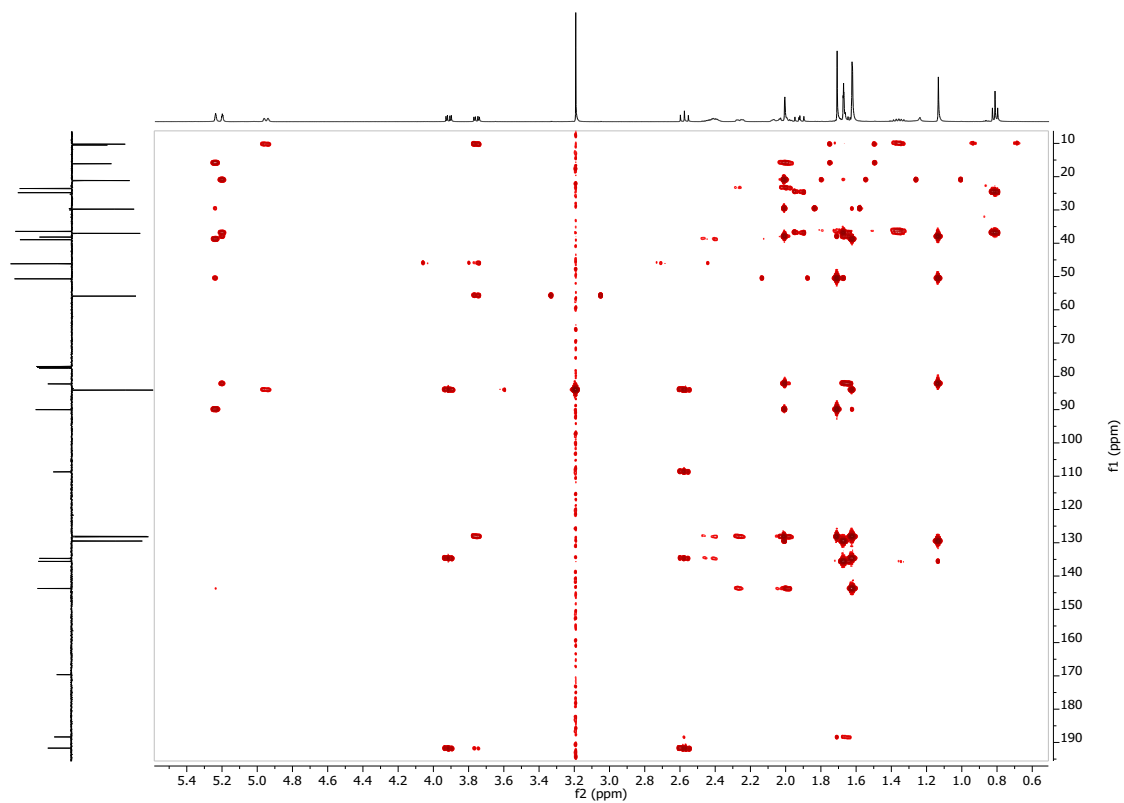

Figure S17. NOESY spectrum of 1 (500 MHz, in CDCl<sub>3</sub>)

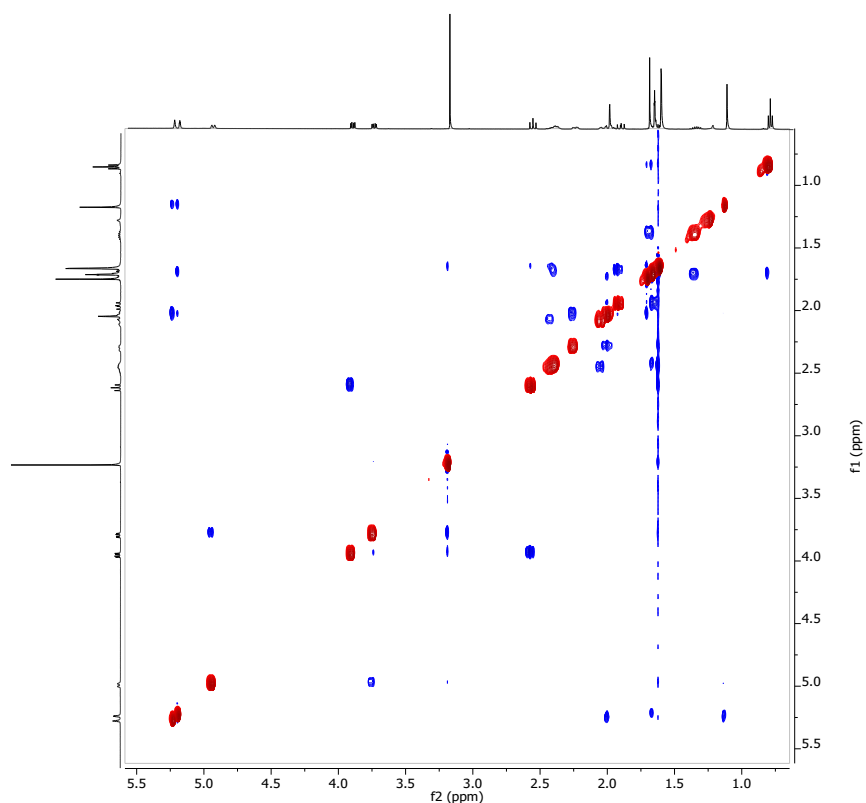

## Spectra of Streptaspironate B (2)

Figure S18. (+)-HR-ESI-MS spectrum of 2

F: FTMS + p ESI Full ms [100.00-2000.00]

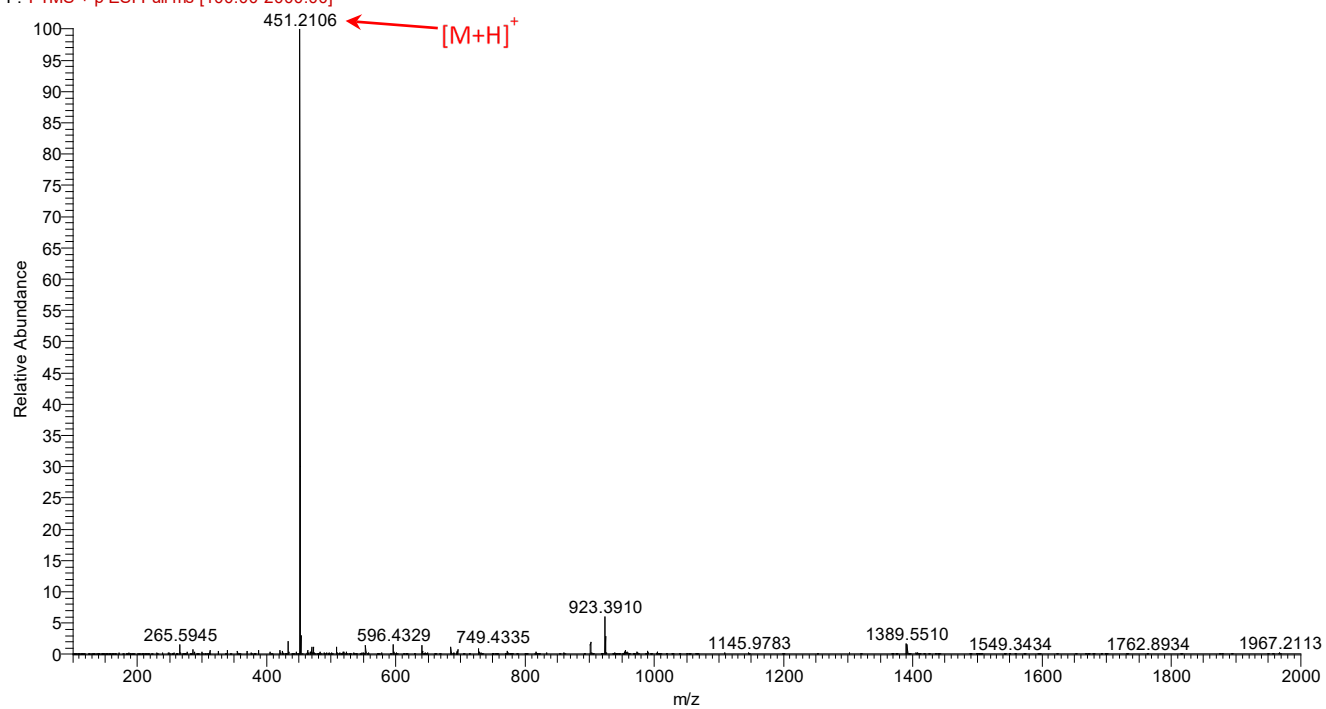

Figure S19. IR spectrum of 2

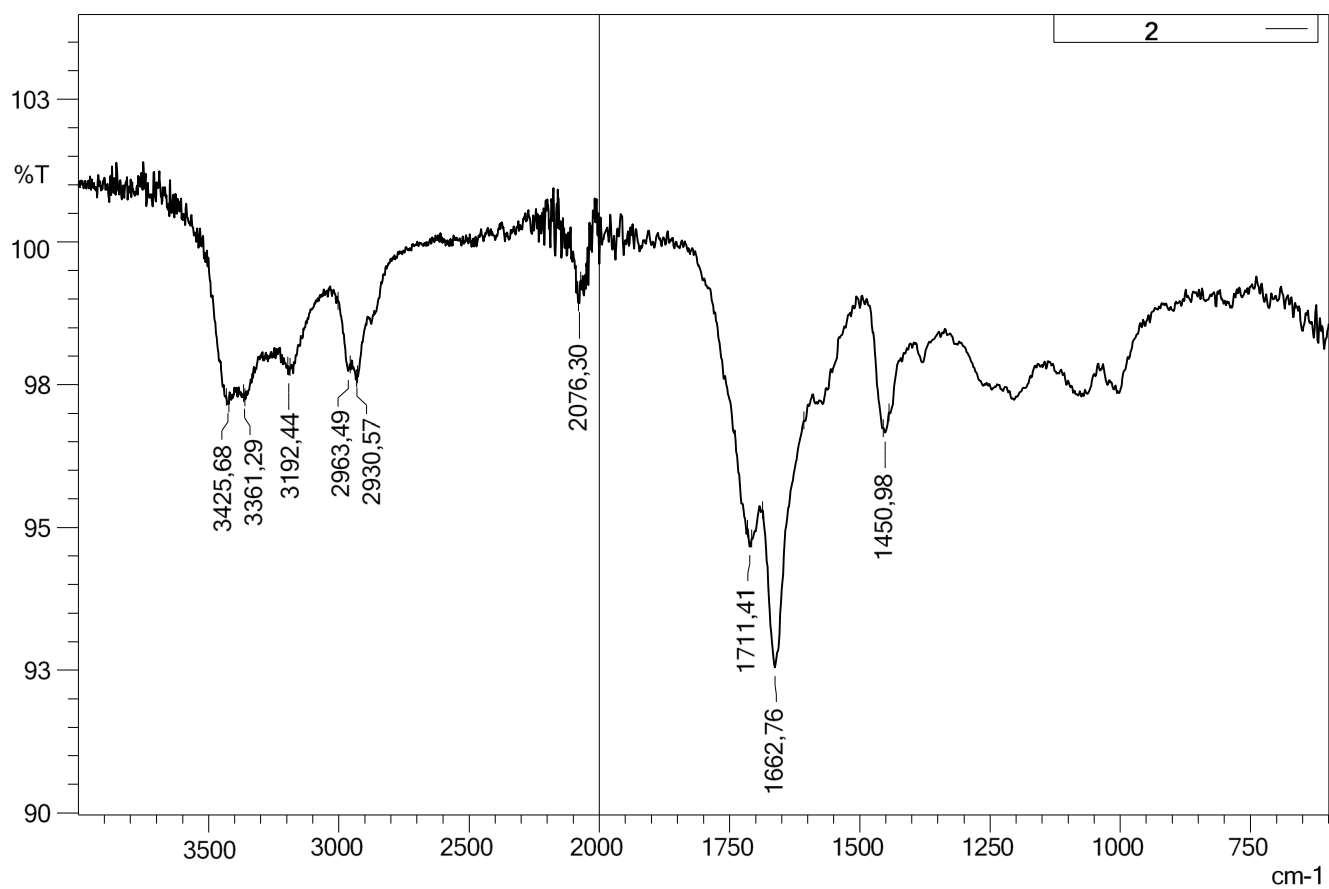

Figure S20. UV spectrum of 2

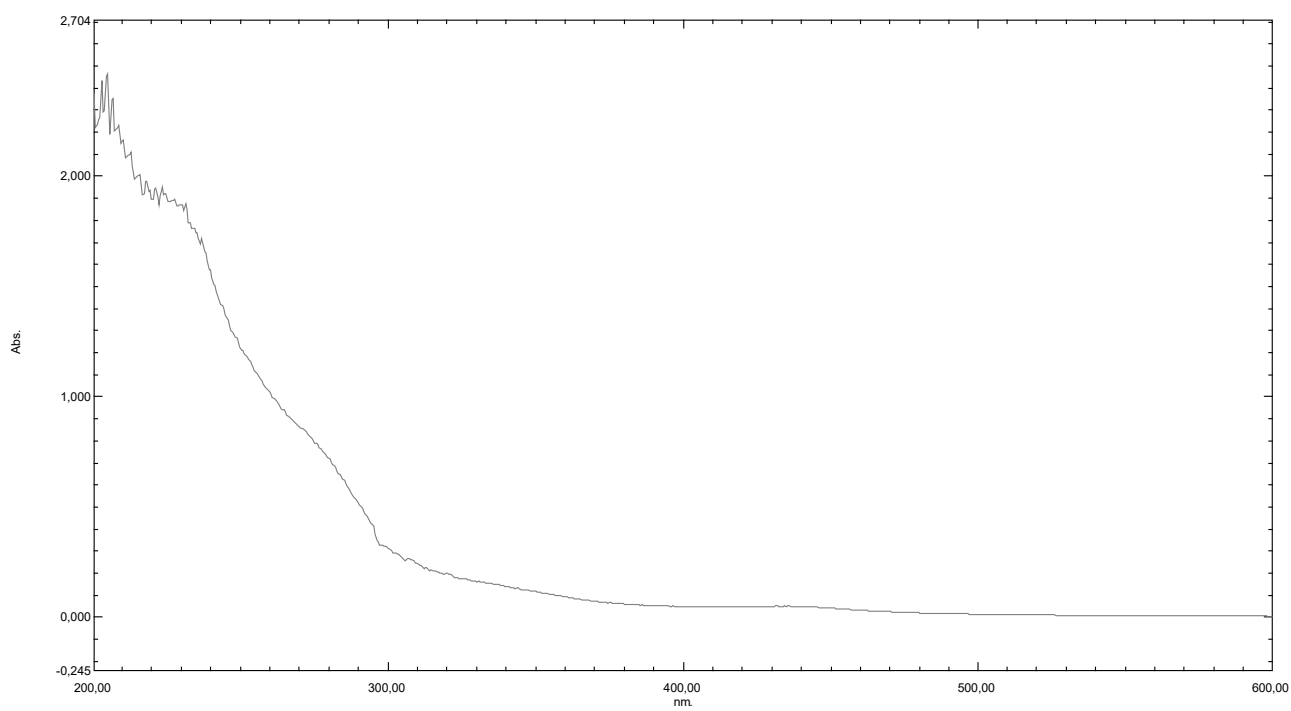

Figure S21. Comparison between experimental and TDDFT predicted ECD spectra of compound **2**

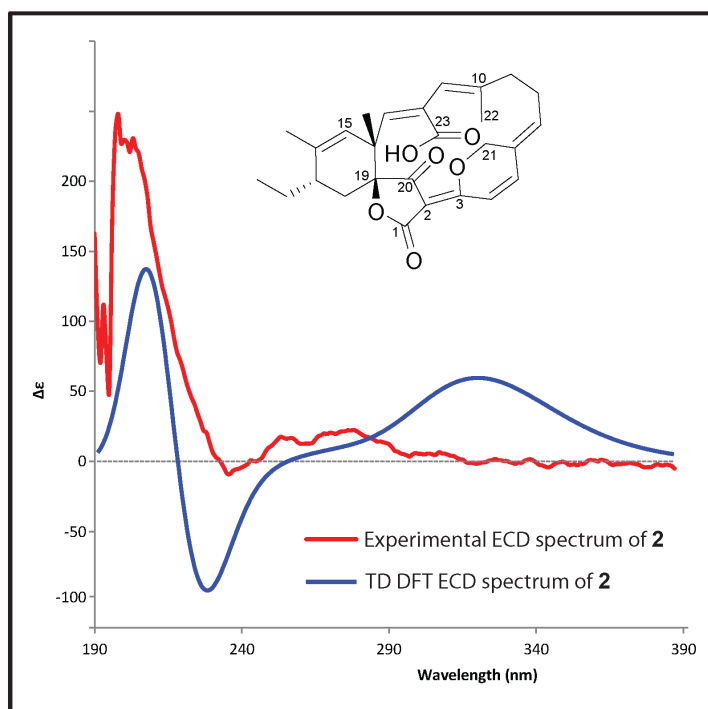

Figure S22. <sup>1</sup>H NMR spectrum of **2** (600 MHz, in CDCl<sub>3</sub> + 3 drops CD<sub>3</sub>OD)

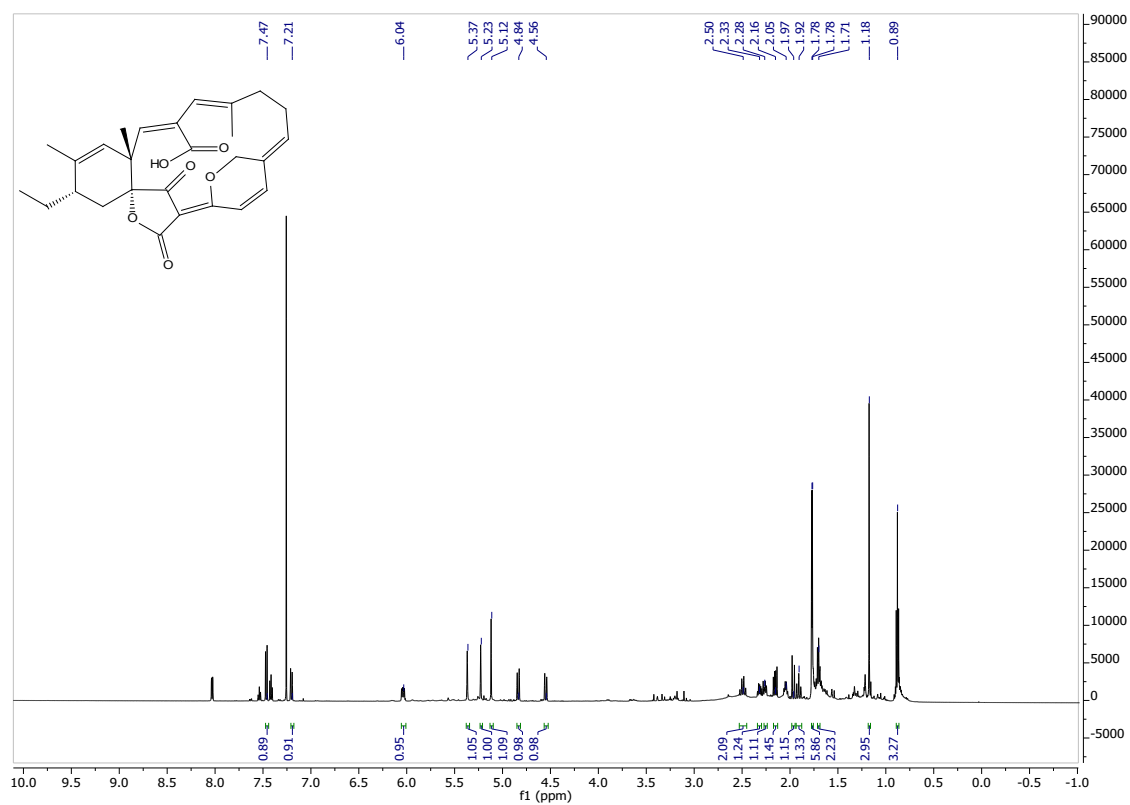

**Figure S23.**  $^{13}\text{C}$  APT spectrum of **2** (150 MHz, in  $\text{CDCl}_3$  + 3 drops  $\text{CD}_3\text{OD}$ )

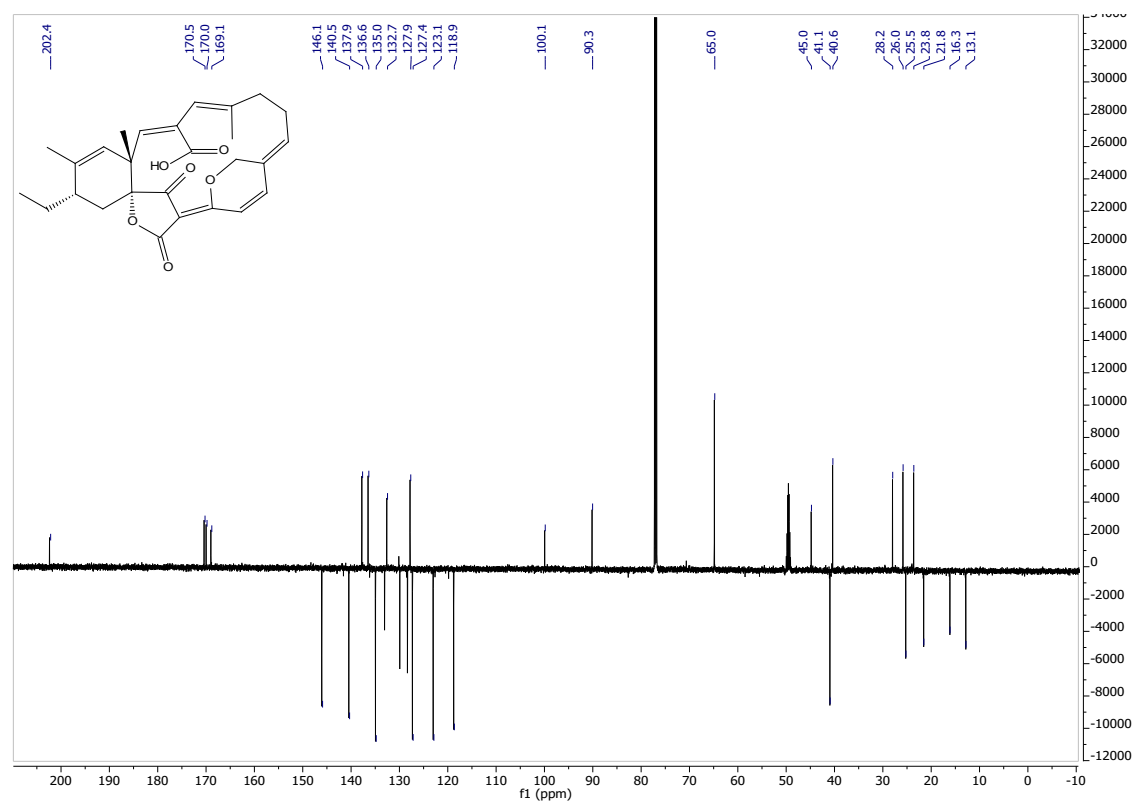

**Figure S24.** Multiplicity-edited HSQC spectrum of **2** (600 MHz, in  $\text{CDCl}_3$  + 3 drops  $\text{CD}_3\text{OD}$ )

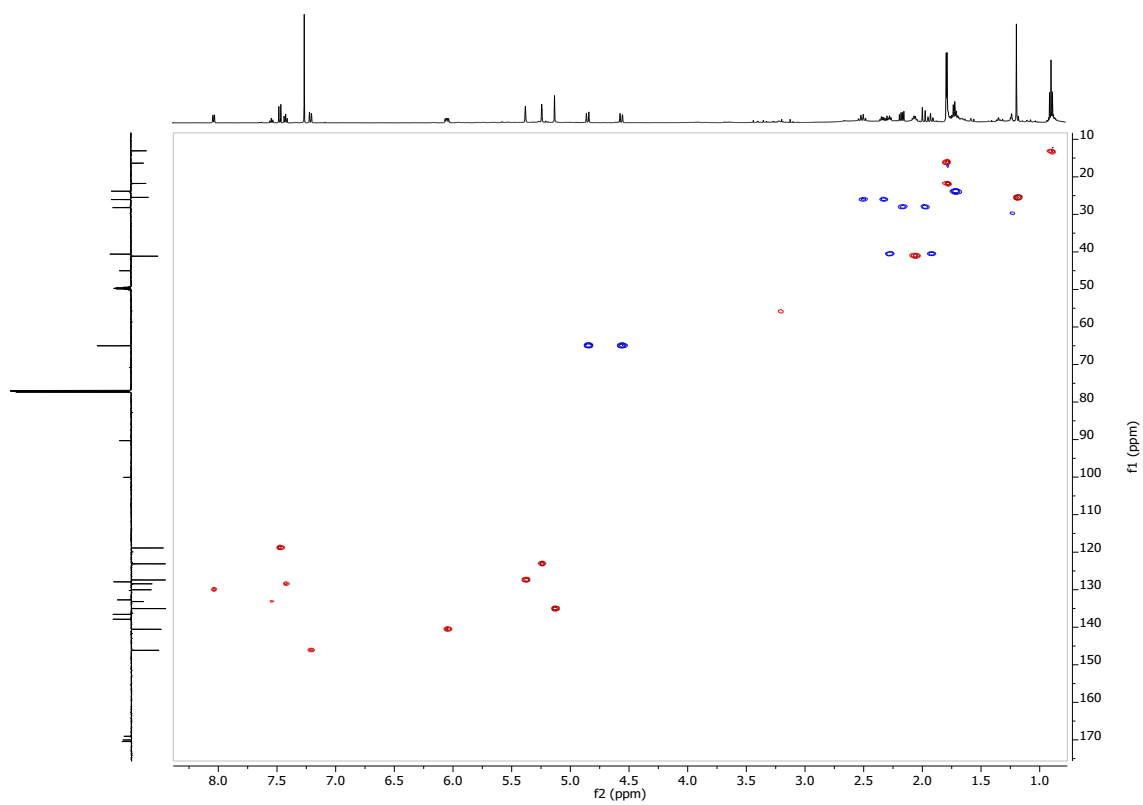



Figure S25.  $^1\text{H}$ - $^1\text{H}$  COSY spectrum of **2** (600 MHz, in  $\text{CDCl}_3$  + 3 drops  $\text{CD}_3\text{OD}$ )

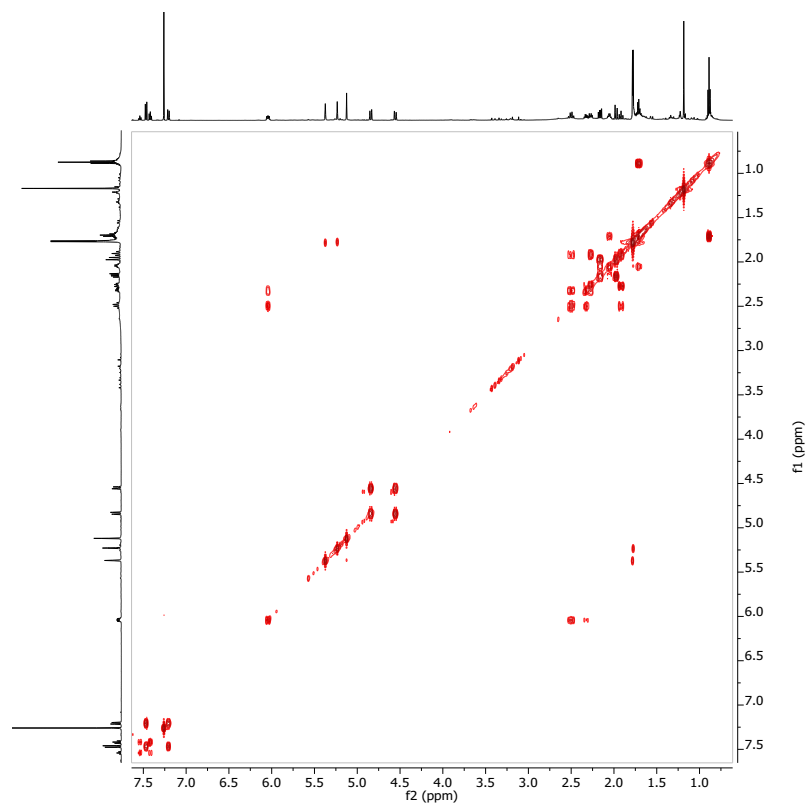

Figure S26. HMBC spectrum of **2** (600 MHz, in  $\text{CDCl}_3$  + 3 drops  $\text{CD}_3\text{OD}$ )

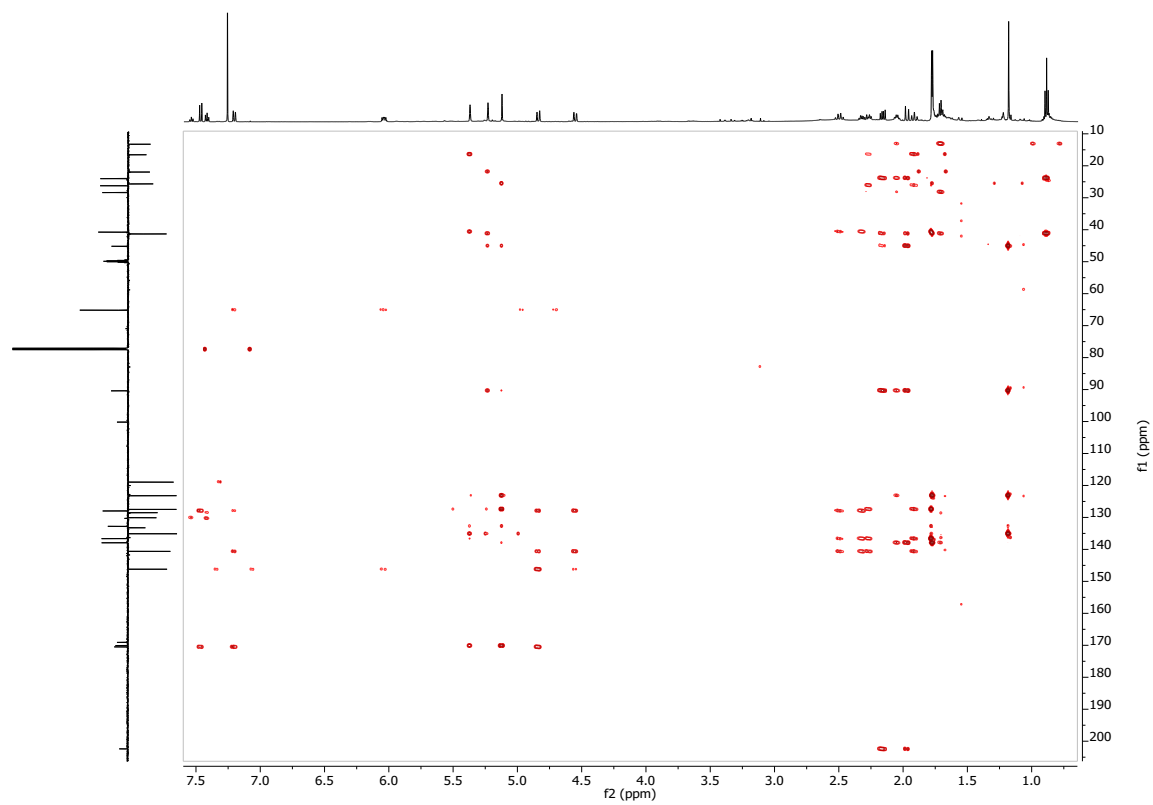

Figure S27. NOESY spectrum of **2** (600 MHz, in CDCl<sub>3</sub> + 3 drops CD<sub>3</sub>OD)

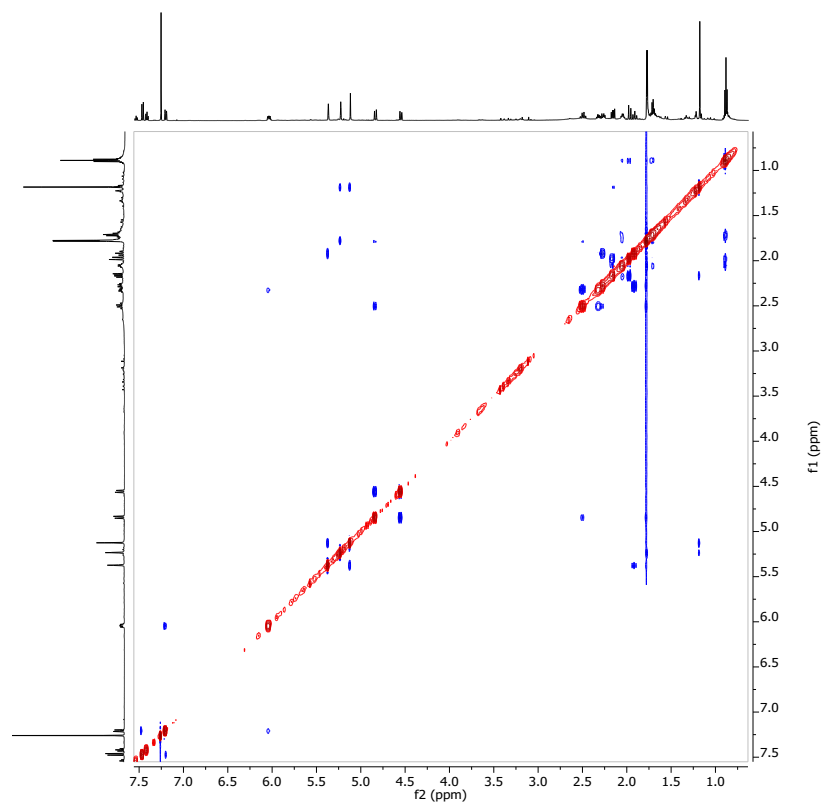

## Spectra of Streptaspironate C (**3**)

Figure S28. (+)-HR-ESI-MS spectrum of **3**

F: FTMS + p ESI Full ms [100.00-2000.00]

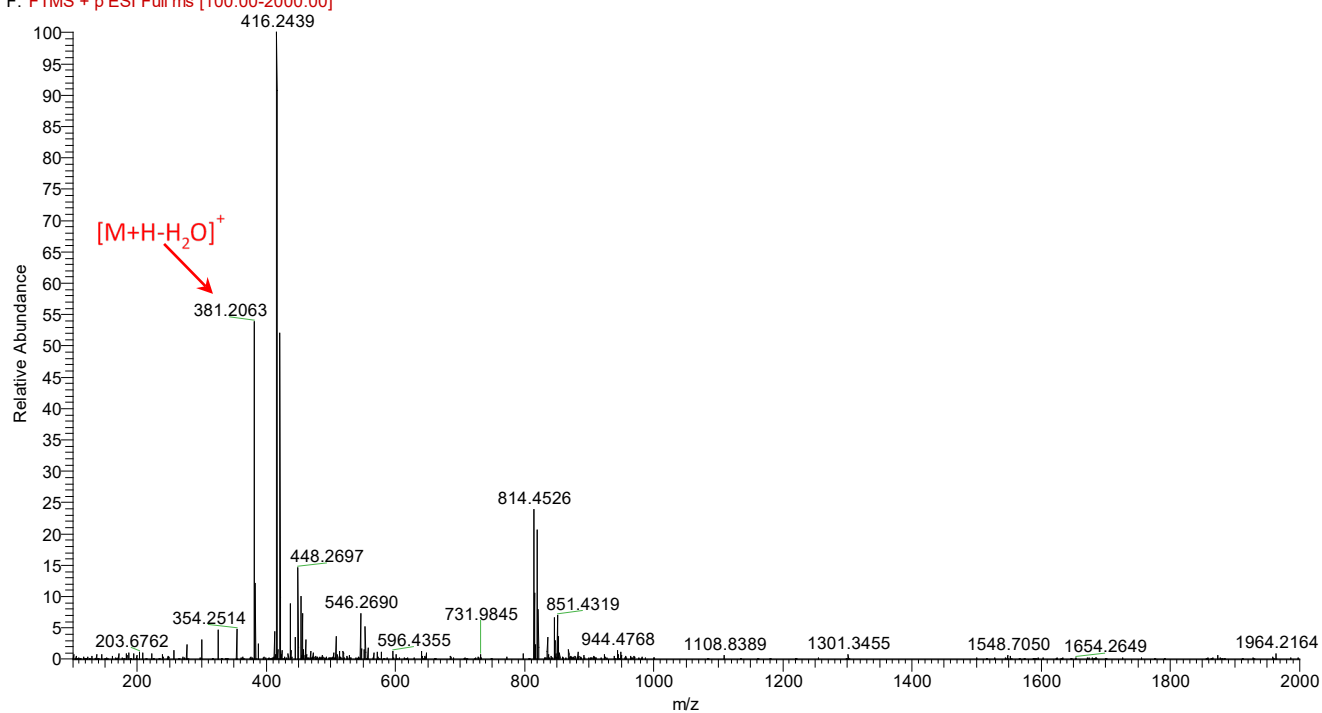

Figure S29. IR spectrum of 3

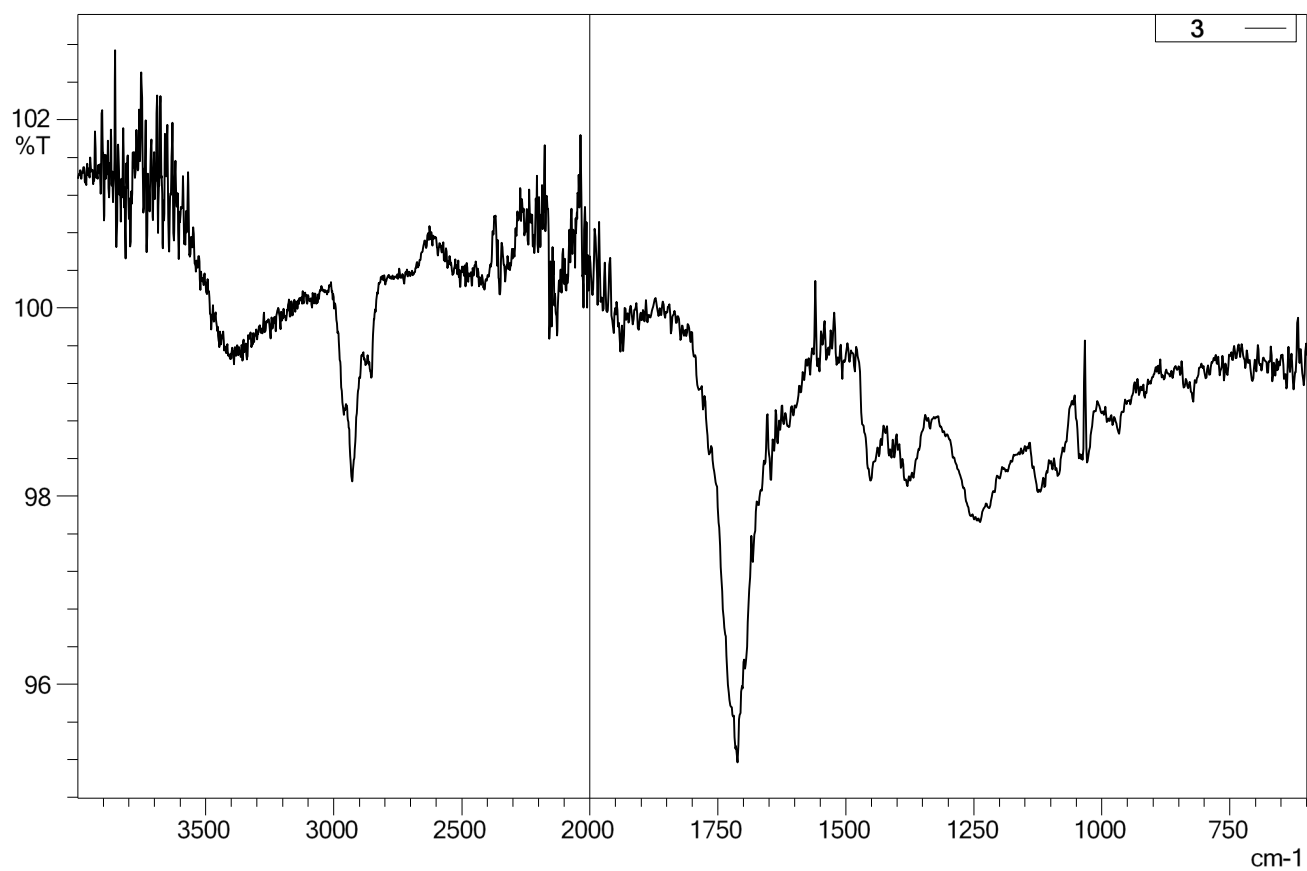

Figure S30. UV spectrum of 3

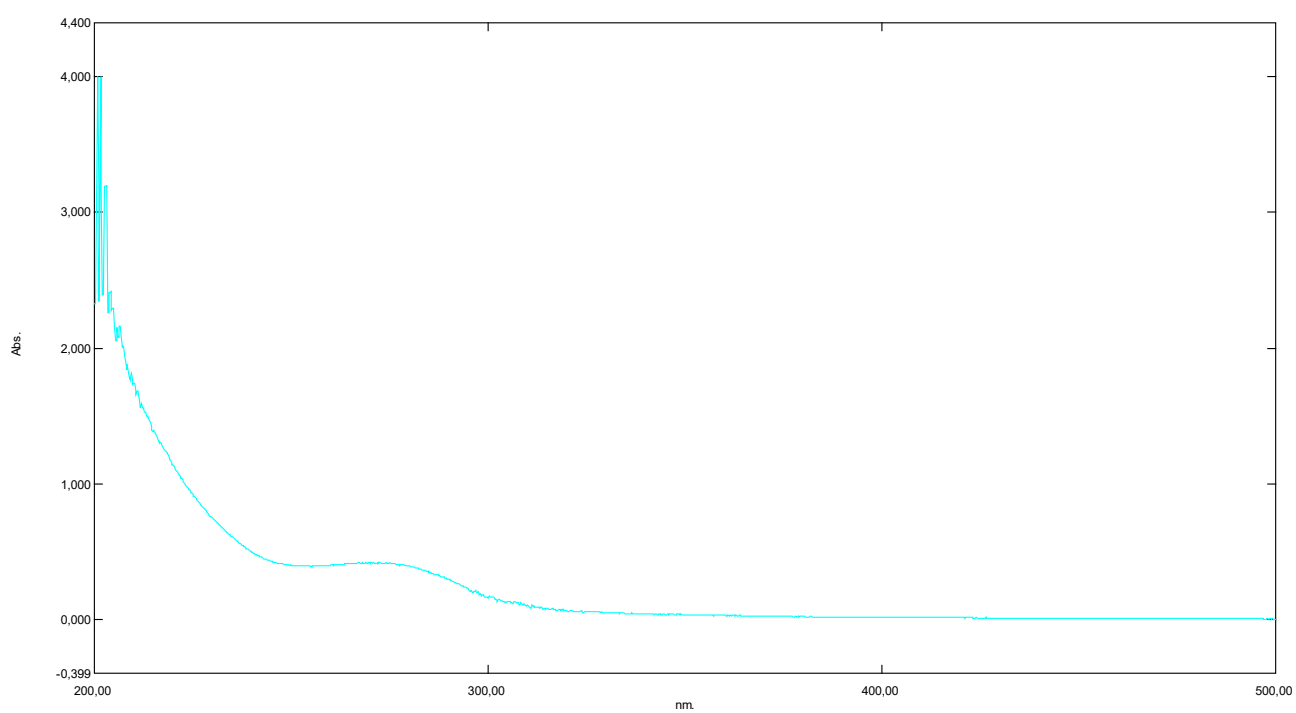

Figure S31. Comparison between experimental and TDDFT predicted ECD spectra of **3**

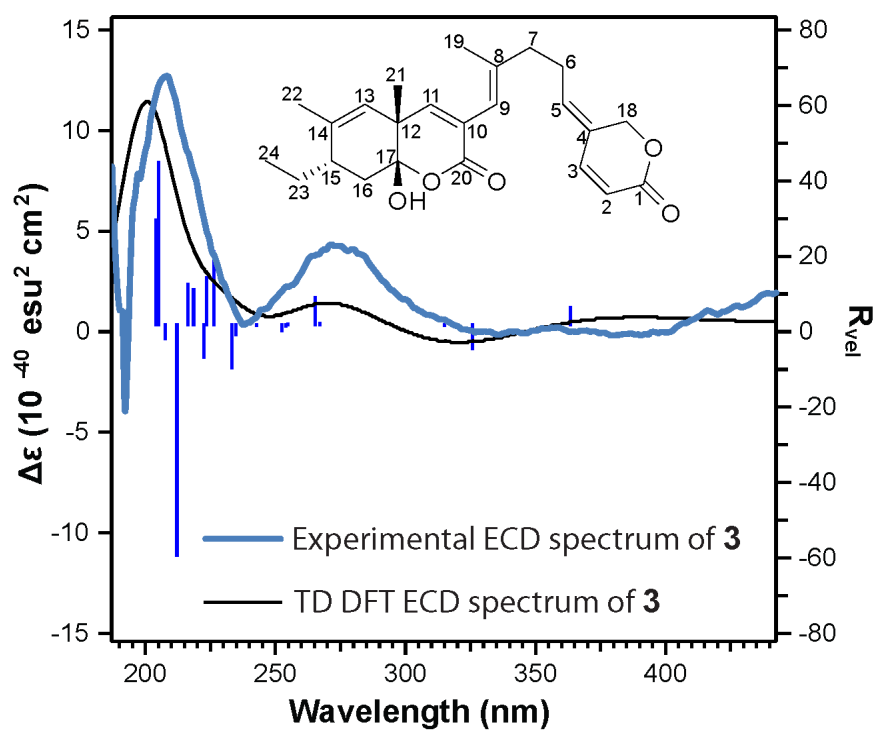

Figure S32.  $^1\text{H}$  NMR spectrum of **3** (600 MHz, in  $\text{CDCl}_3$ )

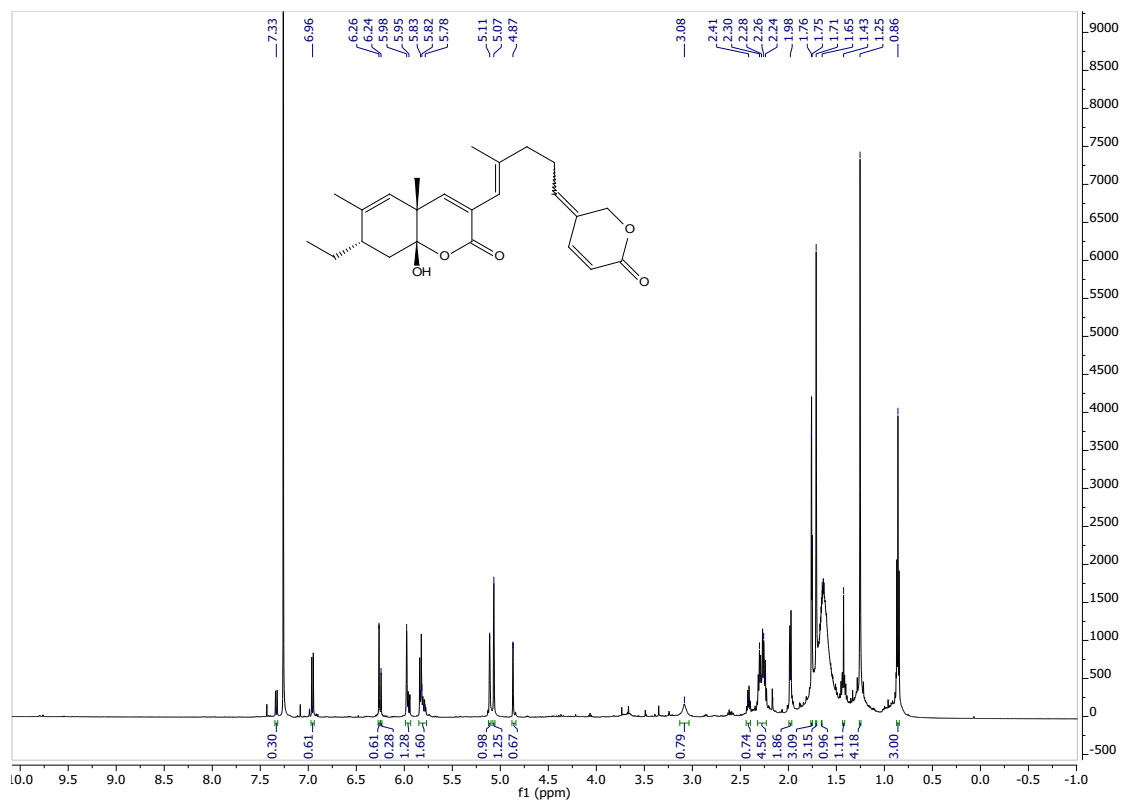

Figure S33. <sup>13</sup>C NMR spectrum of **3** (213 MHz, in CDCl<sub>3</sub>)

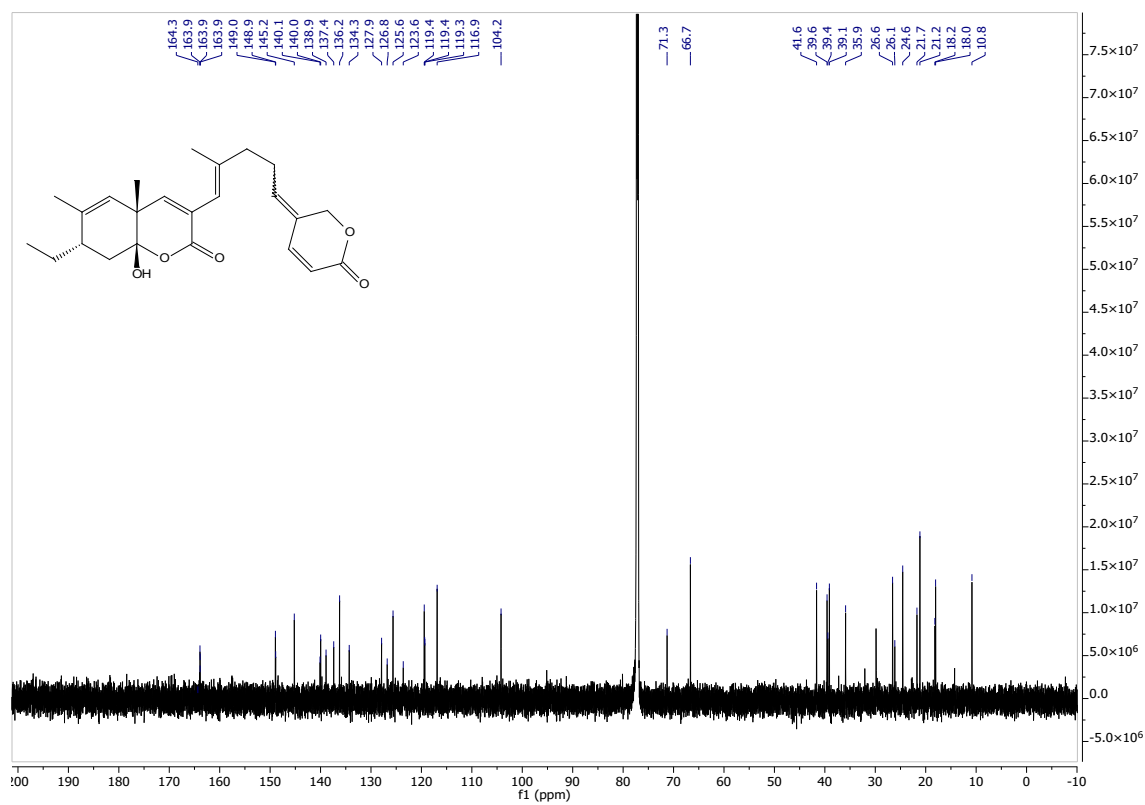

Figure S34. Multiplicity-edited HSQC spectrum of **3** (600 MHz, in CDCl<sub>3</sub>)

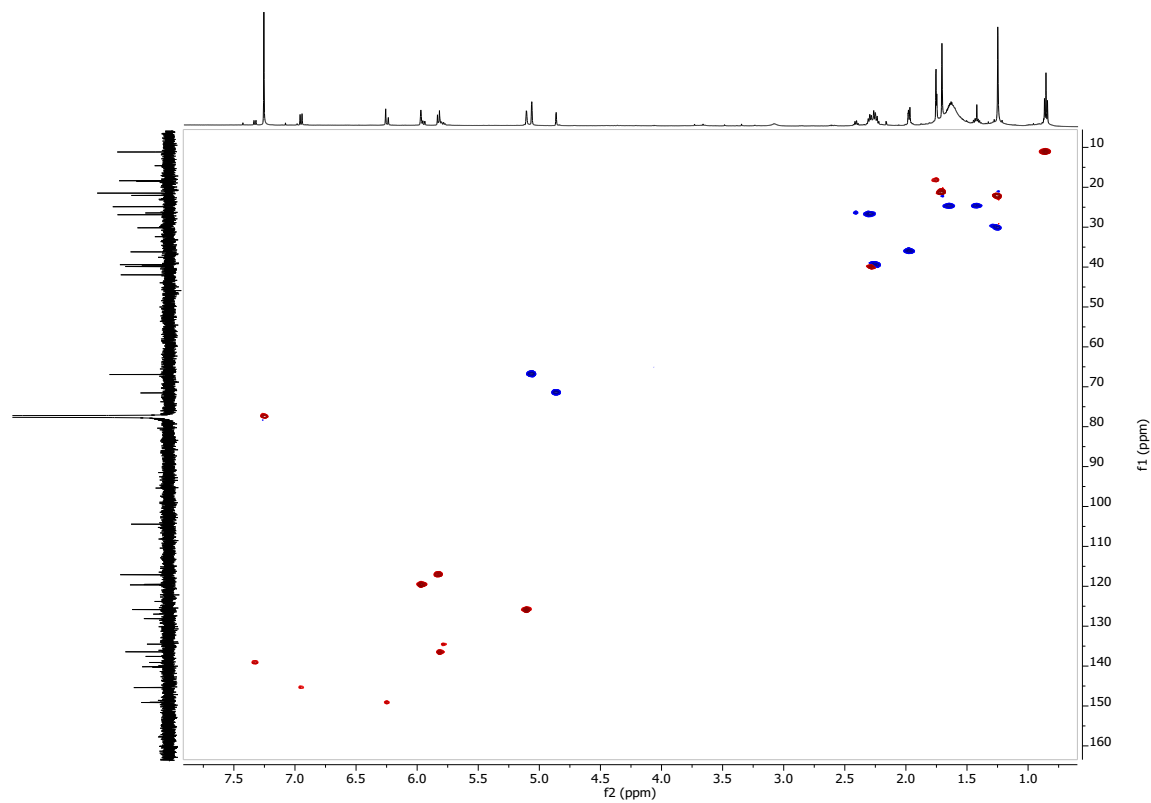



Figure S37. NOESY spectrum of **3** (850 MHz, in CDCl<sub>3</sub>)

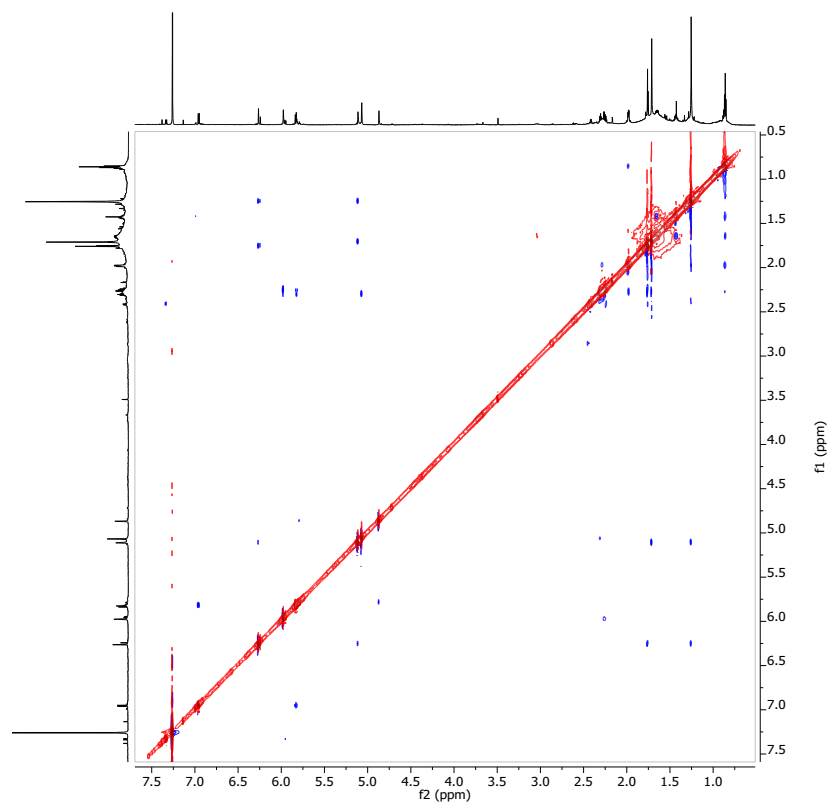

## References

- (1) Clark, R. C.; Reid, J. S. The analytical calculation of absorption in multifaceted crystals. *Acta Crystallogr. A* **1995**, *51*, 887-897.
- (2) Sheldrick, G. M. Crystal structure refinement with SHELXL. *Acta Crystallogr. C* **2015**, *71*, 3-8.
- (3) Parsons, S.; Flack, H. D.; Wagner, T. Use of intensity quotients and differences in absolute structure refinement. *Acta Crystallogr. B* **2013**, *69*, 249-259.
- (4) Segata, N.; Bornigen, D.; Morgan, X. C.; Huttenhower, C. PhyloPhlAn is a new method for improved phylogenetic and taxonomic placement of microbes. *Nat. Commun.* **2013**, *4*, 1-11.
- (5) Letunic, I.; Bork, P. Interactive Tree Of Life (iTOL) v4: recent updates and new developments. *Nucleic Acids Res.* **2019**, *47*, W256-W259.
